# Supplementary material for: A green polyol approach for the synthesis of Cu2O NPs adhered on graphene oxide: a robust and efficient catalyst for 1,2,4-triazole and imidazo[1,2-a]pyridine synthesis
Source: Royal Society of Chemistry journal article supplement (doi:10.1039/d2nj00831a), 2022-01-01
Supplement: d2nj00831a1.pdf [file d2nj00831a1.pdf]

## **A green polyol approach for the synthesis of Cu<sub>2</sub>O NPs adhered on graphene oxide: A robust and efficient catalyst for 1,2,4-triazoles and imidazo[1,2-a]pyridines synthesis**

Shelly Kujur<sup>a</sup>, Shruti Verma<sup>a</sup>, Akash Kumar<sup>a</sup>, Richa Sharma<sup>b</sup> and Devendra Deo Pathak<sup>a\*</sup>

<sup>a</sup>*Department of Chemistry and Chemical Biology, Indian Institute of Technology (ISM), Dhanbad-826004, India*

<sup>b</sup>*Department of Chemistry, Faculty of Science, Dayalbagh Educational Institute, Dayalbagh, Agra-282005, India*

\*Email: [ddpathak@iitism.ac.in](mailto:ddpathak@iitism.ac.in)

\*Phone number: +91 9431126250

### **Contents**

|          |                                                    |                     |
|----------|----------------------------------------------------|---------------------|
| <b>1</b> | <b>HRTEM micrograph of Cu<sub>2</sub>O-GO</b>      | <b>Fig. S1</b>      |
| <b>2</b> | <b>EDX pattern of Cu<sub>2</sub>O-GO</b>           | <b>Fig. S2</b>      |
| <b>3</b> | <b>TGA thermogram of GO and Cu<sub>2</sub>O-GO</b> | <b>Fig. S3</b>      |
| <b>4</b> | <b>FESEM image of recycled catalyst</b>            | <b>Fig. S4</b>      |
| <b>5</b> | <b>FT-IR spectra of recycled catalyst</b>          | <b>Fig. S5</b>      |
| <b>6</b> | <b>Spectral data</b>                               | <b>Fig. S6- S66</b> |
| <b>7</b> | <b>Reference</b>                                   |                     |

## Experimental Section

Graphite mesh, sulfuric acid, sodium nitrate, potassium permanganate, hydrogen peroxide (30%),  $\text{CuNO}_3 \cdot 6\text{H}_2\text{O}$  and ethylene glycol were purchased from Alfa Aesar, TCI, Sigma-Aldrich and Loba. FTIR spectroscopic analysis was recorded on a Perkin Elmer spectrometer between 400 and 4000  $\text{cm}^{-1}$  using KBr pellets. FT-Raman spectroscopic analysis was recorded on Bruker RFS 27: stand-alone FT-Raman spectrometer between 50 and 4000  $\text{cm}^{-1}$  with 2  $\text{cm}^{-1}$  resolutions. The surface morphology was observed by field emission microscope (FESEM) of model FESEM Supra 55 (Carl Zeiss, Germany). The energy-dispersive X-ray spectroscopy (EDX) analysis was carried out on an electron probe microscope (Oxford X-Maxn). Powdered X-ray diffraction (PXRD) of the catalyst was done by PANalytical's X'Pert PRO with  $\text{CuK}\alpha$  radiation ( $\lambda = 0.15418 \text{ nm}$ ). High-resolution transmission electron microscope (HRTEM) image was observed using model Jeol/JE 2100. X-ray photoelectron (XPS) analysis was performed on a PHI 5000 Versa Probe II, FEI Inc. The thermogravimetric analysis was done using EXSTAR, SI 6300 EXSTAR, Inductively coupled plasma-atomic emission spectroscopy (ICP-MS) was carried out using ICP-MS: Thermo Fisher iCAP RQ ICP-MS, Mass spectroscopy was carried out using the ESI method on the Bruker instrument.

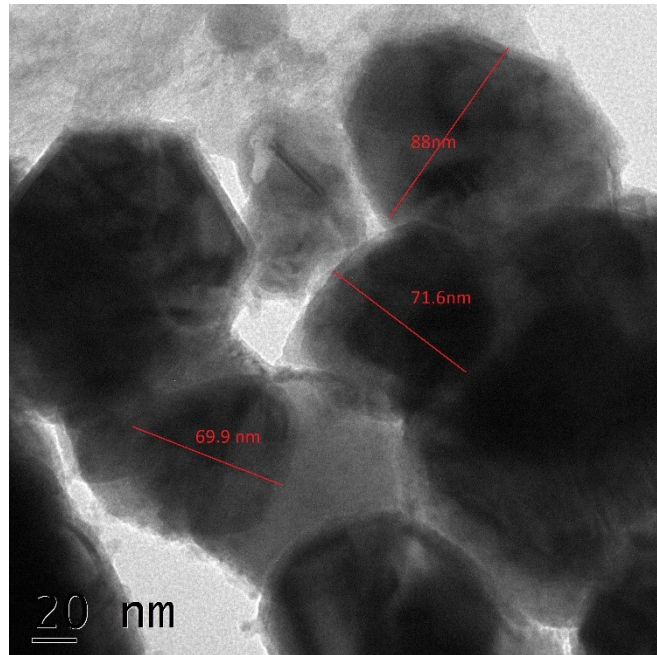

**Fig. S1** HRTEM micrograph of  $\text{Cu}_2\text{O}$ -GO

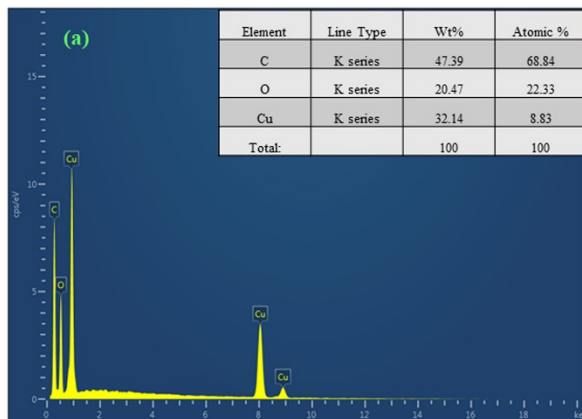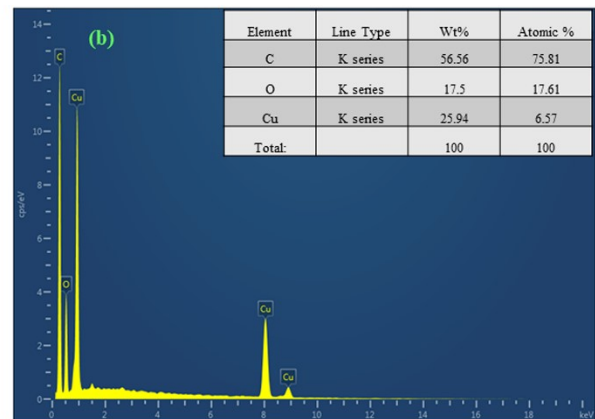

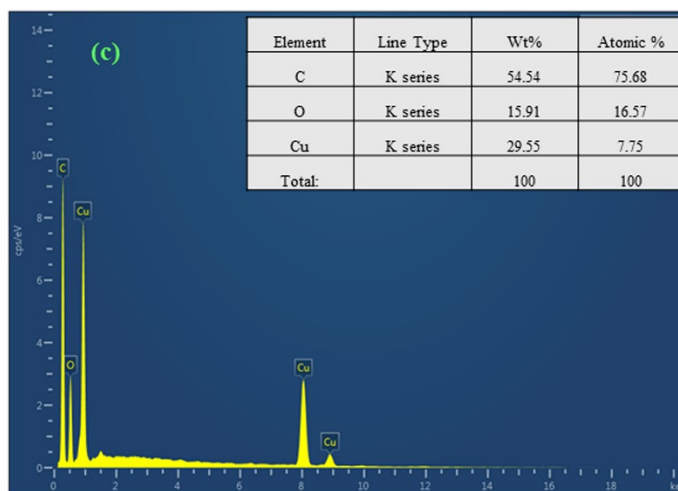

**Fig. S2** EDX spectrum of (a) fresh  $\text{Cu}_2\text{O}@\text{GO}$ , (b)  $\text{Cu}_2\text{O}-\text{GO}$  for 1,2,4- triazole after the fifth cycle and (c)  $\text{Cu}_2\text{O}-\text{GO}$  for imidazo-[1,2a]pyridines after the fifth cycle

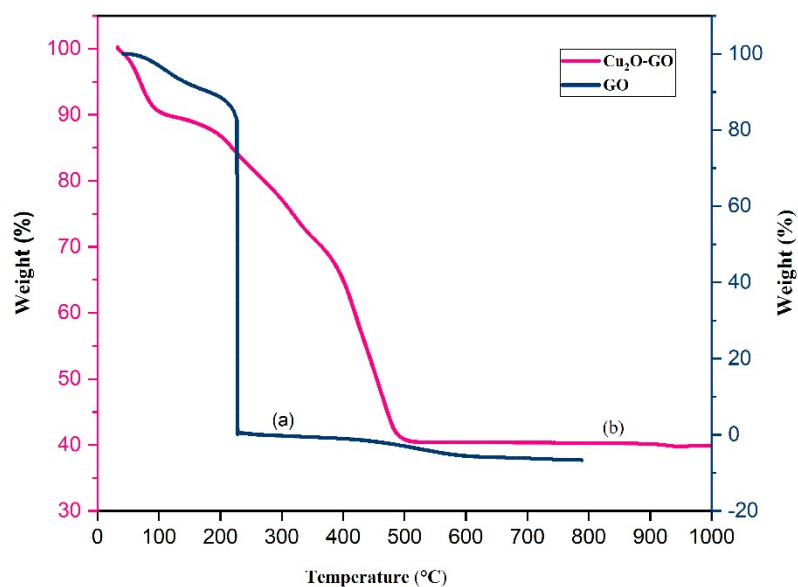

**Fig. S3** TGA thermogram (a)  $\text{Cu}_2\text{O}@\text{GO}$  and (b)  $\text{GO}$

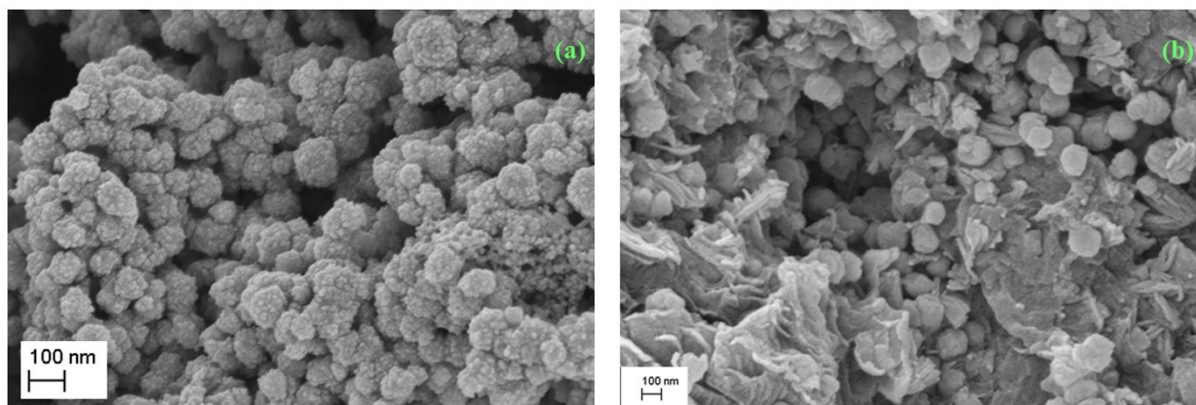

**Fig. S4** FESEM image of  $\text{Cu}_2\text{O}$ -GO after five consecutive cycles (a) 1,2,4-triazoles and (b) imidazo-[1,2a]pyridine

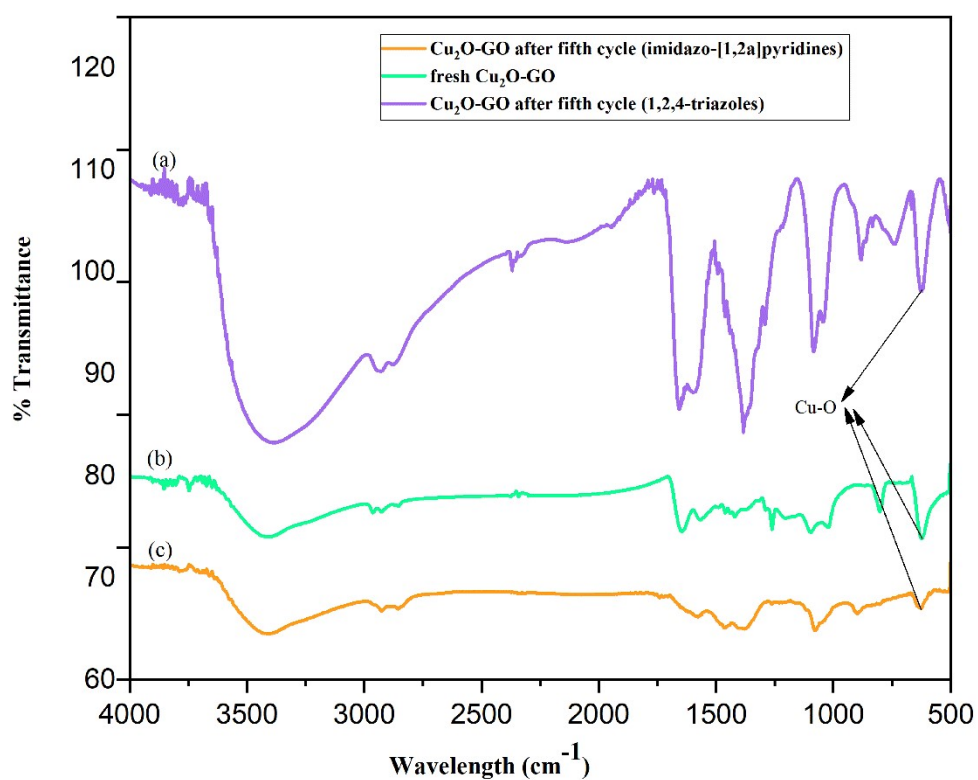

**Fig. S5** FT-IR plot (a)  $\text{Cu}_2\text{O}$ -GO after the fifth cycle synthesis of 1,2,4-triazole, (b) Fresh  $\text{Cu}_2\text{O}$ -GO and (c)  $\text{Cu}_2\text{O}$ -GO after the fifth cycle synthesis of imidazo-[1,2a]pyridines.

### Physical and spectral data 1,2,4-triazoles

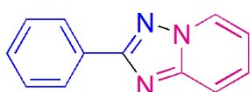

### 2-Phenyl-[1,2,4]triazolo[1,5-a]pyridine<sup>[1]</sup> (3a)

White solid, m.p. 134-135 °C;  $\delta_{\text{H}}$  (400 MHz,  $\text{CDCl}_3$ ) 8.60 (1 H, d,  $J$  6.8), 8.25 – 8.22 (2 H, m), 7.76 (1 H, d,  $J$  9.0), 7.58 – 7.42 (4 H, m), 7.05 – 7.01 (1 H, m).  $^{13}\text{C}$  NMR (100 MHz,  $\text{CDCl}_3$ )  $\delta$  164.13, 151.65, 130.72, 130.08, 129.50, 128.68, 128.29, 127.29, 116.35, 113.59.

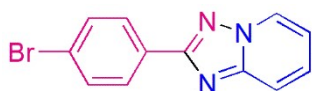

### 2-(4-Bromophenyl)-[1,2,4]triazolo[1,5-a]pyridine<sup>[2]</sup> (3b)

White solid, m.p. 229-230 °C;  $\delta_{\text{H}}$  (400 MHz,  $\text{CDCl}_3$ ) 8.52 (1 H, d,  $J$  6.8), 8.09 (3 H, d,  $J$  7.4), 7.69 (1 H, d,  $J$  8.9), 7.56 (2 H, d,  $J$  7.5), 7.49 – 7.43 (2 H, m), 6.99 – 6.94 (1 H, m).  $\delta_{\text{C}}$  (100 MHz,  $\text{CDCl}_3$ ) 163.29, 151.71, 131.95, 129.78, 129.74, 128.83, 128.37, 124.54, 116.47, 113.89.

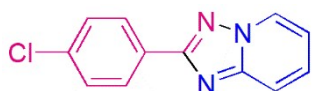

### 2-(4-Chlorophenyl)-[1,2,4]triazolo[1,5-a]pyridine<sup>[3]</sup> (3c)

White solid, 221-222 °C;  $\delta_{\text{H}}$  (400 MHz,  $\text{CDCl}_3$ ) 8.57 (2 H, d,  $J$  6.8), 8.21 (3 H, d,  $J$  8.6), 7.74 (2 H, d,  $J$  9.0), 7.55 – 7.47 (3 H, m), 7.02 – 7.00 (1 H, m).  $^{13}\text{C}$  NMR (100 MHz,  $\text{CDCl}_3$ ) 163.21, 151.68, 136.09, 129.67, 129.28, 128.93, 128.56, 128.31, 116.40, 113.78.

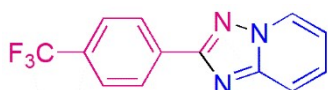

### 2-(4-(Trifluoromethyl)phenyl)-[1,2,4]triazolo[1,5-a]pyridine<sup>[3]</sup> (3d)

White solid, m. p. 235-236 °C;  $\delta_{\text{H}}$  (400 MHz,  $\text{CDCl}_3$ ) 8.61 (1 H, d,  $J$  6.8), 8.39 (2 H, d,  $J$  8.1), 7.80 – 7.72 (4 H, m), 7.57 – 7.51 (1 H, m), 7.08 – 7.02 (1 H, m).  $^{13}\text{C}$  NMR (100 MHz,  $\text{CDCl}_3$ ) 162.82, 151.75, 134.20, 131.93, 129.94, 128.46, 127.56, 125.68, 122.72, 116.65, 114.14, 109.45, 109.41.

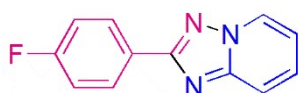

### 2-(4-Fluorophenyl)-[1,2,4]triazolo[1,5-a]pyridine<sup>[1]</sup> (3e)

White solid, m.p. 173-174;  $\delta_{\text{H}}$  (400 MHz,  $\text{CDCl}_3$ ) 8.58 (3 H, d,  $J$  6.8), 8.27 (7 H, dd,  $J$  8.9, 5.5), 7.74 (3 H, d,  $J$  8.9), 7.53 – 7.50 (1 H, m), 7.18 – 7.16 (2 H, m), 7.02 – 6.99 (1 H, m).  $\delta_{\text{C}}$  (100 MHz,  $\text{CDCl}_3$ ) 165.35, 163.38, 151.73, 129.69, 129.33, 128.34, 127.02, 116.37, 115.68, 113.73.

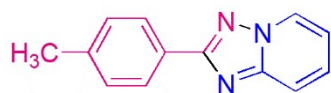

**2-*p*-Tolyl-[1,2,4]triazolo[1,5-*a*]pyridine<sup>[4]</sup> (3f)**

White solid, m.p. 167-168 °C,  $\delta_{\text{H}}$  (400 MHz, CDCl<sub>3</sub>) 8.58 (1 H, d, *J* 6.8), 8.17 (2 H, d, *J* 8.1), 7.74 (1 H, d, *J* 8.7), 7.51 – 7.46 (1 H, m), 7.30 (2 H, d, *J* 8.0), 7.00 – 6.96 (1 H, m), 2.42 (3 H, s).  $\delta_{\text{C}}$  (100 MHz, CDCl<sub>3</sub>) 164.32, 151.68, 140.27, 129.67, 129.48, 128.30, 127.94, 127.23, 116.31, 113.52, 21.52.

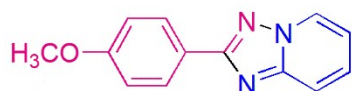

**2-(4-Methoxyphenyl)-[1,2,4]triazolo[1,5-*a*]pyridine<sup>[1]</sup> (3g)**

White solid, 135-136 °C,  $\delta_{\text{H}}$  (400 MHz, CDCl<sub>3</sub>) 8.48 (1 H, d, *J* 6.8), 8.14 (2 H, d, *J* 6.9), 7.64 (1 H, d, *J* 8.1), 7.41 – 7.37 (1 H, m), 6.93 (2 H, d, *J* 8.9), 6.90 – 6.86 (1 H, m), 3.79 (3 H, s).  $\delta_{\text{C}}$  (100 MHz, CDCl<sub>3</sub>) 163.90, 161.04, 151.56, 129.38, 128.76, 128.18, 123.32, 116.07, 114.08, 113.33, 55.43.

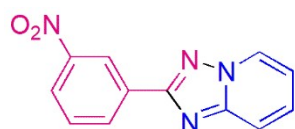

**2-(3-Nitrophenyl)-[1,2,4]triazolo[1,5-*a*]pyridine<sup>[5]</sup> (3h)**

White solid, mp 281-282 °C,  $\delta_{\text{H}}$  (400 MHz, CDCl<sub>3</sub>) 9.11 – 9.07 (1 H, m), 8.59 – 8.54 (2 H, m), 8.28 – 8.24 (1 H, m), 7.74 (1 H, d, *J* 9.0), 7.64 – 7.59 (1 H, m), 7.54 – 7.49 (1 H, m), 7.05 – 7.00 (1 H, m).  $\delta_{\text{C}}$  (100 MHz, CDCl<sub>3</sub>) 162.08, 151.82, 132.99, 132.71, 130.13, 129.77, 128.53, 124.61, 122.35, 116.74, 114.35.

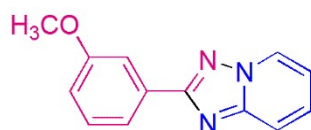

**2-(3-Methoxyphenyl)-[1,2,4]triazolo[1,5-*a*]pyridine<sup>[1]</sup> (3i)**

White solid, m.p. 106-108 °C,  $\delta_{\text{H}}$  (400 MHz, CDCl<sub>3</sub>) 8.49-8.46 (1 H, m), 7.79 (1 H, d, *J* 7.6), 7.66 – 7.63 (1 H, m), 7.35 (2 H, d, *J* 8.9), 7.33 – 7.31 (1 H, m), 6.95-6.93 (2 H, m), 6.84 (2 H, t, *J* 7.9), 3.81 (3 H, s).  $\delta_{\text{C}}$  (100 MHz, CDCl<sub>3</sub>) 163.90, 159.86, 151.51, 132.00, 129.73, 129.53, 128.25, 119.73, 116.67, 116.23, 113.64, 111.72, 55.35.

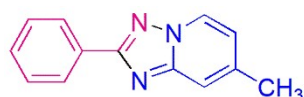

**7-Methyl-2-phenyl-[1,2,4]triazolo[1,5-*a*]pyridine<sup>[4]</sup> (3j)**

**White solid, m.p. 142-144 °C**,  $\delta_{\text{H}}$  (400 MHz,  $\text{CDCl}_3$ ) 8.45 (1 H, d,  $J$  6.9), 8.26 (2 H, dd,  $J$  8.0, 1.6), 7.50 – 7.46 (4 H, m), 6.81 (1 H, dd,  $J$  7.0, 1.6), 2.48 (3 H, s).  $\delta_{\text{C}}$  (100 MHz,  $\text{CDCl}_3$ ) 164.20, 151.91, 141.06, 130.91, 130.00, 128.70, 127.25, 116.12, 115.00, 21.63.

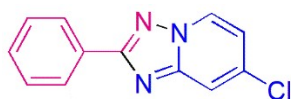

**7-Chloro-2-phenyl-[1,2,4]triazolo[1,5-a]pyridine<sup>[5]</sup> (3k)**

White solid, m.p. 189-190°C  $\delta_{\text{H}}$  (400 MHz,  $\text{CDCl}_3$ ) 8.48 (1 H, d,  $J$  7.9), 8.25 – 8.23 (2 H, m), 7.73 (1 H, d,  $J$  2.7), 7.49 – 7.47 (3 H, m), 6.96 (1 H, dd,  $J$  7.2, 2.2).  $\delta_{\text{C}}$  (100 MHz,  $\text{CDCl}_3$ ) 165.23, 151.83, 136.21, 130.42, 128.78, 128.47, 127.37, 115.45, 115.18

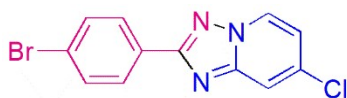

**2-(4-Bromophenyl)-7-chloro-[1,2,4]triazolo[1,5-a]pyridine (3l) new**

**White solid, m.p. 195-197 °C**,  $\delta_{\text{H}}$  (400 MHz,  $\text{CDCl}_3$ ) 8.49 (1 H, d,  $J$  7.2), 8.13 – 8.11 (2 H, m), 7.73 (1 H, dd,  $J$  2.1, 0.6), 7.64 – 7.61 (2 H, m), 7.01 (1 H, dd,  $J$  7.2, 2.1).  $\delta_{\text{C}}$  (100 MHz,  $\text{CDCl}_3$ ) 164.38, 151.87, 136.47, 132.02, 129.31, 128.89, 128.49, 124.89, 115.44. HRMS ( $M+H$ ) 309.940 calculated for  $\text{C}_{12}\text{H}_7\text{BrClN}_3$ : 309.5685; found 309.9401

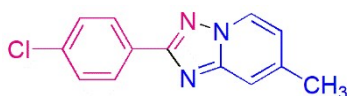

**2-(4-Chlorophenyl)-7-methyl[1,2,4]triazolo[1,5-a]pyridine<sup>[5]</sup> (3m)**

**White solid, m.p. 169-171 °C**,  $\delta_{\text{H}}$  (400 MHz,  $\text{CDCl}_3$ ) 8.39 (2 H, d,  $J$  7.0), 8.18 – 8.15 (3 H, m), 7.46 – 7.41 (5 H, m), 6.79 (2 H, dd,  $J$  6.9, 1.6), 2.44 (3 H, s).  $\delta_{\text{C}}$  (100 MHz,  $\text{CDCl}_3$ ) 163.17, 151.87, 141.26, 135.94, 129.45, 128.90, 128.51, 127.25, 116.28, 114.96, 21.61.

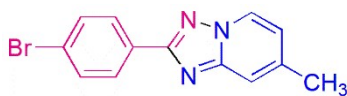

**2-(4-Bromophenyl)-7-methyl[1,2,4]triazolo[1,5-a]pyridine<sup>[6]</sup> (3n)**

**White solid, m.p. 179-181 °C**,  $\delta_{\text{H}}$  (400 MHz,  $\text{CDCl}_3$ ) 8.43-8.38 (1 H, m), 8.12 – 8.08 (2 H, m), 7.61 – 7.45 (3 H, m), 6.81 (1 H, dd,  $J$  6.9, 1.7), 2.46 (3 H, s).  $\delta_{\text{C}}$  (100 MHz,  $\text{CDCl}_3$ ) 163.22, 151.87, 141.33, 131.87, 129.88, 128.98, 127.76, 124.36, 116.34, 114.98, 113.42, 21.64. HRMS-ESI:  $m/z$  [ $M + H$ ]<sup>+</sup> calcd for  $\text{C}_{13}\text{H}_{10}\text{BrN}_3$ : 288.0131; found: 288.0034

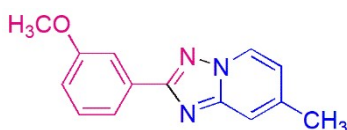



### 2-(3-Methoxyphenyl)-7-methyl[1,2,4]triazolo[1,5-a]pyridine <sup>[7]</sup> (3o)

White solid, m.p. 143-144 °C  $\delta_{\text{H}}$  (400 MHz, CDCl<sub>3</sub>) 8.54 (1 H, d, *J* 6.8), 7.82 (1 H, d, *J* 7.6), 7.76 – 7.75 (1 H, m), 7.70 (2 H, d, *J* 8.9), 7.47 – 7.43 (2 H, m), 7.34 (2 H, t, *J* 7.9), 6.97 – 6.92 (3 H, m), 3.85 (3 H, s).  $\delta_{\text{C}}$  (100 MHz, CDCl<sub>3</sub>) 164.10, 159.94, 151.66, 132.03, 129.82, 129.62, 128.36, 119.82, 116.92, 116.44, 113.73, 111.67, 55.47.

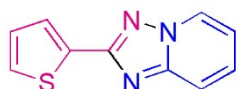

### 2-(Thiophen-2-yl)-[1,2,4]triazolo[1,5-a]pyridine<sup>[5]</sup> (3p)

White solid, m.p. 155-156 °C,  $\delta_{\text{H}}$  (400 MHz, CDCl<sub>3</sub>) 8.55 (1 H, d, *J* 6.8), 7.88 (1 H, dd, *J* 3.6, 1.2), 7.71 (1 H, d, *J* 9.0), 7.56 – 7.48 (1 H, m), 7.46 (1 H, dd, *J* 5.0, 1.2), 7.15 (1 H, dd, *J* 5.0, 3.7), 6.98 (1 H, td, *J* 6.9, 1.2).  $\delta_{\text{C}}$  (100 MHz, CDCl<sub>3</sub>) 160.23, 151.50, 133.54, 129.89, 128.23, 128.04, 127.91, 127.73, 116.18, 113.81.

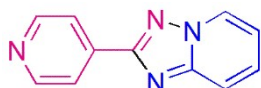

### 2-(Pyridin-4-yl)-[1,2,4]triazolo[1,5-a]pyridine<sup>[2]</sup> (3q)

White solid m.p. 190-192 °C,  $\delta_{\text{H}}$  (400 MHz, CDCl<sub>3</sub>) 8.73 (3 H, d, *J* 6.0), 8.60 (1 H, d, *J* 6.8), 8.12 (2 H, d, *J* 6.0), 7.78 (1 H, d, *J* 9.0), 7.57 – 7.54 (1 H, m), 7.08 – 7.05 (1 H, m).  $\delta_{\text{C}}$  (100 MHz, CDCl<sub>3</sub>) 161.89, 151.75, 150.40, 138.29, 130.13, 128.53, 121.35, 116.85, 114.46, 110.57.

## Physical and spectral data imidazo-[1,2-a]pyridines

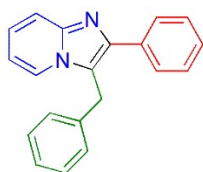

### 3-Benzyl-2-phenylimidazo[1,2-a]pyridine<sup>[8]</sup> (4a)

White solid, m.p. 118-119 °C,  $\delta_{\text{H}}$  (400 MHz, CDCl<sub>3</sub>) 7.79 (2 H, d, *J* 6.9), 7.75 – 7.69 (2 H, m), 7.45 – 7.41 (2 H, m), 7.39 – 7.24 (5 H, m), 7.23 – 7.10 (4 H, m), 6.75 (1 H, t, *J* 7.0), 4.51 (2 H, s).  $\delta_{\text{C}}$  (100 MHz, CDCl<sub>3</sub>) 144.61, 143.61, 136.61, 133.95, 129.11, 128.73, 128.43, 128.26, 127.71, 127.00, 124.70, 123.49, 117.74, 117.39, 112.355, 29.85.

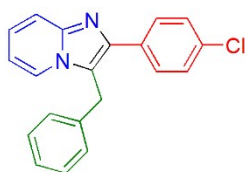

### 3-benzyl-2-(4-chlorophenyl)H-imidazo[1,2-a]pyridine<sup>[9]</sup> (4b)

White solid, m.p. 145-146 °C  $\delta_{\text{H}}$  (400 MHz,  $\text{CDCl}_3$ ) 7.72 – 7.67 (4 H, m), 7.38 (2 H, d,  $J$  8.5), 7.30 – 7.24 (3 H, m), 7.18 – 7.15 (1 H, m), 7.11 (2 H, d,  $J$  6.9), 6.72 – 6.68 (1 H, m), 4.44 (2 H, s).  $\delta_{\text{C}}$  (100 MHz,  $\text{CDCl}_3$ ) 144.90, 142.91, 136.50, 133.71, 133.00, 129.41, 128.86, 127.65, 127.07, 124.53, 123.44, 117.87, 117.54, 112.44, 29.81.

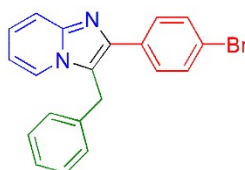

### 3-benzyl-2-(4-bromophenyl)H-imidazo[1,2-a]pyridine<sup>[8]</sup> (4c)

White solid, m.p. 160-161 °C,  $\delta_{\text{H}}$  (400 MHz,  $\text{CDCl}_3$ ) 7.70 – 7.64 (4 H, m), 7.54 (2 H, d,  $J$  8.5), 7.31 – 7.25 (3 H, m), 7.20 – 7.17 (1 H, m), 7.10 (2 H, s,  $J$  6.9), 6.73 – 6.69 (1 H, m), 4.45 (2 H, s).  $\delta_{\text{C}}$  (100 MHz,  $\text{CDCl}_3$ ) 144.95, 143.00, 136.49, 133.51, 131.81, 129.70, 129.14, 127.65, 127.07, 124.50, 123.44, 121.94, 117.88, 117.59, 112.42, 29.84.

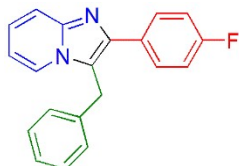

### 3-Benzyl-2-(4-fluorophenyl)imidazo[1,2-a]pyridine<sup>[10]</sup> (4d)

Yellow oil,  $\delta_{\text{H}}$  (400 MHz,  $\text{CDCl}_3$ ) 7.74 – 7.65 (4 H, m), 7.28 – 7.22 (3 H, m), 7.16 – 7.14 (1 H, m), 7.10 – 7.06 (4 H, m), 6.68 – 6.65 (1 H, m), 4.42 (2 H, s).  $\delta_{\text{C}}$  (100 MHz,  $\text{CDCl}_3$ ) 163.81, 144.79, 143.10, 136.58, 130.56, 129.92, 129.84, 129.13, 127.64, 127.04, 124.48, 123.44, 117.40, 1015.73, 112.38, 29.74.

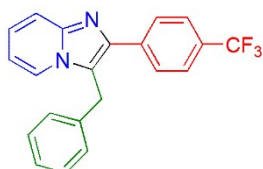

### 3-benzyl-2-(4-(trifluoromethyl)phenyl)imidazo[1,2-a]pyridine<sup>[9]</sup> (4e)

White solid,  $\delta_{\text{H}}$  (400 MHz,  $\text{CDCl}_3$ ) 7.90 (1 H, d,  $J$  6.9), 7.67 (2 H, d,  $J$  9.1), 7.46 – 7.39 (1 H, m), 7.34 – 7.32 (1 H, m), 7.28 (3 H, d,  $J$  7.4), 7.14 (2 H, d,  $J$  7.1), 7.12 – 7.08 (2 H, m), 6.73 (1 H, d,  $J$  0.9), 4.48 (2 H, s).  $\delta_{\text{C}}$  (100 MHz,  $\text{CDCl}_3$ ) 144.99, 142.41, 136.25, 129.19, 128.34, 127.60, 127.16, 125.62, 124.92, 123.52, 118.59, 117.68, 112.72, 29.79.

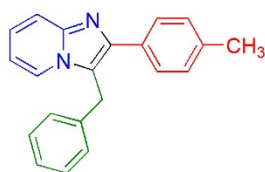

### 3-Benzyl-2-*p*-tolylimidazo[1,2-*a*]pyridine<sup>[9]</sup> (4f)

White solid, m.p. 160-161°C;  $\delta_{\text{H}}$  (400 MHz, CDCl<sub>3</sub>) 7.73 (2 H, d, *J* 9.1), 7.68 (5 H, d, *J* 8.1), 7.29 – 7.25 (6 H, m), 7.15 – 7.13 (3 H, m, *J* 7.0), 6.70 (2 H, t, *J* 6.3), 4.47 (2 H, s), 2.38 (3 H, s).  $\delta_{\text{C}}$  (100 MHz, CDCl<sub>3</sub>) 144.67, 143.73, 137.64, 136.77, 131.21, 129.43, 129.04, 128.17, 127.71, 126.92, 124.46, 123.49, 117.45, 117.34, 112.36, 29.75, 21.31.

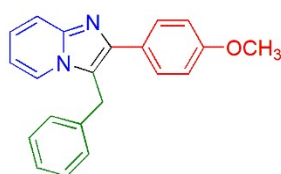

### 3-benzyl-2-(4-methoxyphenyl)imidazo[1,2-*a*]pyridine<sup>[10]</sup> (4g)

White solid,  $\delta_{\text{H}}$  (400 MHz, CDCl<sub>3</sub>) 7.76 (2 H, d, *J* 8.2), 7.71 – 7.69 (2 H, m), 7.31 – 7.26 (4 H, m), 7.22 – 7.12 (4 H, m), 6.96 (2 H, d, *J* 7.7), 6.75 – 6.72 (1 H, m), 4.68 (2 H, s), 3.83 (3 H, s).  $\delta_{\text{C}}$  (100 MHz, CDCl<sub>3</sub>) 159.54, 144.48, 136.64, 129.52, 129.10, 127.00, 126.23, 123.36, 117.08, 114.20, 112.57, 55.32, 29.81.

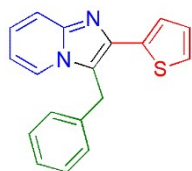

### 3-Benzyl-2-(2-thiophenyl)imidazo[1,2-*a*]pyridine<sup>[10]</sup> (4h)

Yellow oil,  $\delta_{\text{H}}$  (400 MHz, CDCl<sub>3</sub>) 7.72 (1 H, d, *J* 6.9), 7.66 (2 H, d, *J* 9.1), 7.41 – 7.40 (1 H, m), 7.35 – 7.34 (1 H, m), 7.27 – 7.23 (3 H, m, *J* 9.3, 5.6), 7.17 – 7.15 (3 H, m, *J* 7.1), 7.10 – 7.09 (1 H, m), 6.73 – 6.69 (1 H, m), 4.54 (2 H, s).  $\delta_{\text{C}}$  (100 MHz, CDCl<sub>3</sub>) 144.79, 138.53, 137.49, 136.37, 129.04, 127.80, 127.00, 125.62, 124.59, 124.55, 123.18, 117.38, 112.44, 29.90.

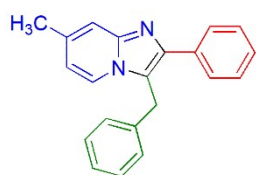

### 3-Benzyl-7-methyl-2-phenylimidazo[1,2-*a*]pyridine<sup>[8]</sup> (4i)

White solid, m.p. 145-146°C;  $\delta_{\text{H}}$  (400 MHz, CDCl<sub>3</sub>) 7.77 – 7.74 (2 H, m), 7.55 (1 H, d, *J* 6.5), 7.53 – 7.36 (4 H, m), 7.34 – 7.20 (4 H, m), 7.11 (2 H, d, *J* 7.0), 6.53 – 6.51 (1 H, m), 4.40 (2 H, s), 2.35 (3 H, s).  $\delta_{\text{C}}$  (100 MHz, CDCl<sub>3</sub>) 145.06, 142.98, 136.81, 135.96, 133.93, 129.52, 129.05, 128.67, 127.83, 127.70, 126.94, 122.71, 117.17, 115.60, 115.26, 29.69, 21.33.

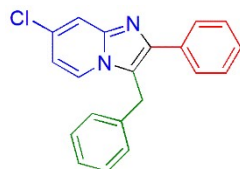

### 3-Benzyl-7-chloro-2-phenylimidazo[1,2-*a*]pyridine<sup>[8]</sup> (4j)

Light yellow solid, m.p. 142-143;  $\delta_{\text{H}}$  (400 MHz, CDCl<sub>3</sub>) 7.77 (2 H, d, *J* 7.1), 7.65 (1 H, d, *J* 1.6), 7.55 (1 H, d, *J* 7.3), 7.41 (2 H, t, *J* 7.4), 7.34 (1 H, d, *J* 7.1), 7.39 – 7.25 (3 H, m), 7.10 (2 H, d, *J* 6.9), 6.64 (1 H, dd, *J* 7.3, 2.0), 4.43 (2 H, s).  $\delta_{\text{C}}$  (100 MHz, CDCl<sub>3</sub>) 148.59, 145.08, 136.07, 133.90, 129.23, 128.08, 127.64, 127.24, 123.58, 118.86, 117.78, 112.84, 29.79.

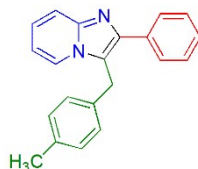

### 3-(4-Methylbenzyl)-2-phenylimidazo[1,2-*a*]pyridine<sup>[9]</sup> (4k)

White solid. Mp 125-126 °C.  $\delta_{\text{H}}$  (400 MHz, CDCl<sub>3</sub>) 7.80 (2 H, d, *J* 7.2), 7.77 – 7.66 (2 H, m), 7.43 (2 H, t, *J* 7.5), 7.34 (1 H, t, *J* 7.4), 7.19 – 7.14 (1 H, m), 7.11 (2 H, d, *J* 7.8), 7.02 (2 H, d, *J* 7.9), 6.68 (1 H, t, *J* 6.8), 4.44 (2 H, s), 2.32 (3 H, s).  $\delta_{\text{C}}$  (100 MHz, CDCl<sub>3</sub>) 144.81, 143.89, 136.55, 134.41, 133.59, 129.75, 128.67, 128.26, 127.77, 127.61, 124.31, 123.49, 117.95, 117.47, 112.27, 29.45, 21.06.

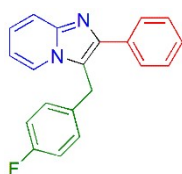

### 3-(4-Fluorobenzyl)-2-phenylimidazo[1,2-*a*]pyridine<sup>[9]</sup> (4l)

Yellow oil,  $\delta_{\text{H}}$  (400 MHz,  $\text{CDCl}_3$ ) 7.86 – 7.79 (2 H, m), 7.72 (1 H, d,  $J$  6.8), 7.41 (1 H, d,  $J$  7.6), 7.34 – 7.29 (1 H, m), 7.18 – 7.12 (1 H, m), 7.10 – 7.05 (2 H, m), 6.98 (2 H, t,  $J$  8.6), 6.76 – 6.73 (1 H, m), 4.43 (2 H, s).  $\delta_{\text{C}}$  (100 MHz,  $\text{CDCl}_3$ ) 160.63, 144.73, 143.56, 132.08, 129.10, 128.75, 127.92, 124.92, 123.31, 117.56, 117.41, 115.86, 112.74, 29.01.

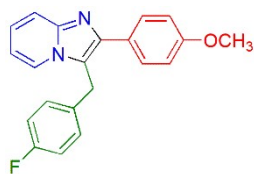

### 3-(4-fluorobenzyl)-2-(4-methoxyphenyl)imidazo[1,2-a]pyridine<sup>[11]</sup> (4m)

Yellow semi solid,  $\delta_{\text{H}}$  (400 MHz,  $\text{CDCl}_3$ ) 7.79 – 7.66 (4 H, m), 7.32 – 7.25 (1 H, m), 7.08 (2 H, dd,  $J$  8.3, 5.5), 6.99 – 6.95 (4 H, m), 6.75 (1 H, t,  $J$  6.1), 4.43 (2 H, s), 3.83 (3 H, s).  $\delta_{\text{C}}$  (100 MHz,  $\text{CDCl}_3$ ) 163.05, 160.62, 159.49, 144.68, 143.68, 132.32, 129.42, 129.17, 129.09, 126.52, 124.50, 117.30, 116.82, 116.05, 115.83, 114.19, 112.44, 55.32, 29.09.

### <sup>1</sup>H and <sup>13</sup>C NMR spectra of organic products

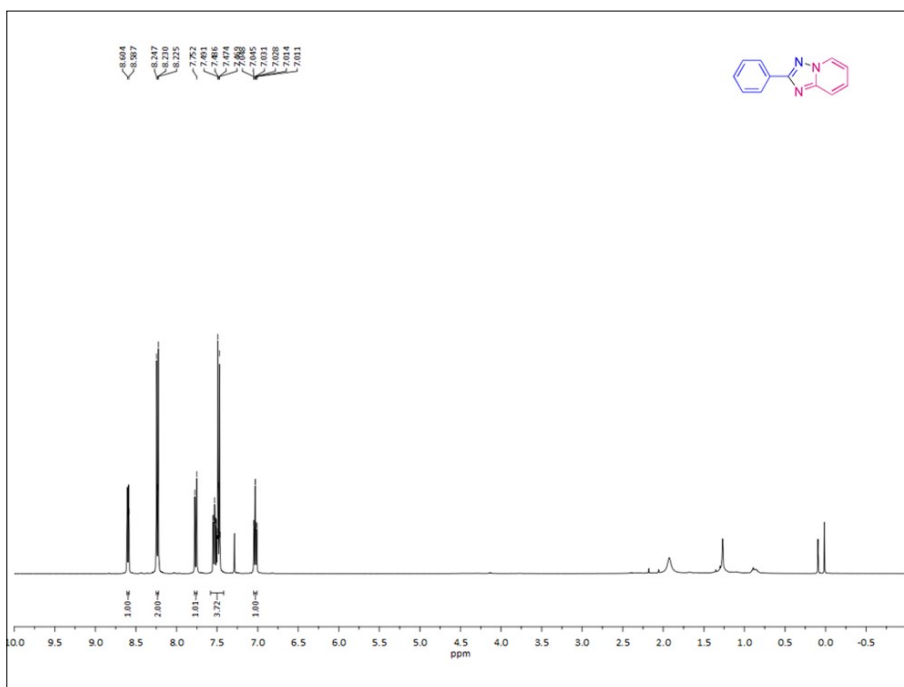

**Fig. S6**  $^1\text{H}$  NMR of 2-Phenyl-[1,2,4]triazolo[1,5-a]pyridine (3a)

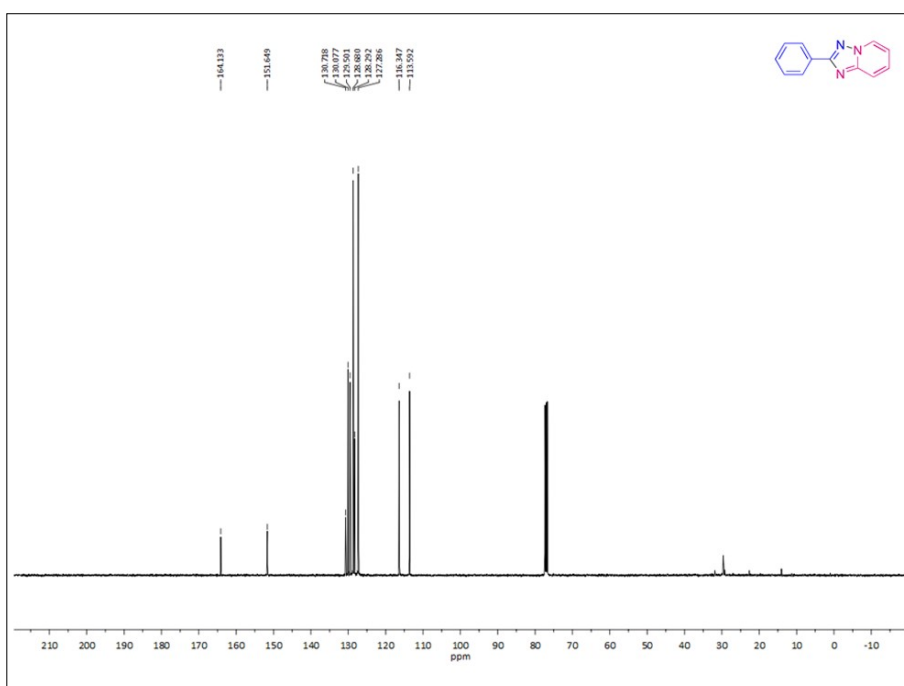

**Fig. S7**  $^{13}\text{C}$  NMR of 2-Phenyl-[1,2,4]triazolo[1,5-a]pyridine (3a)

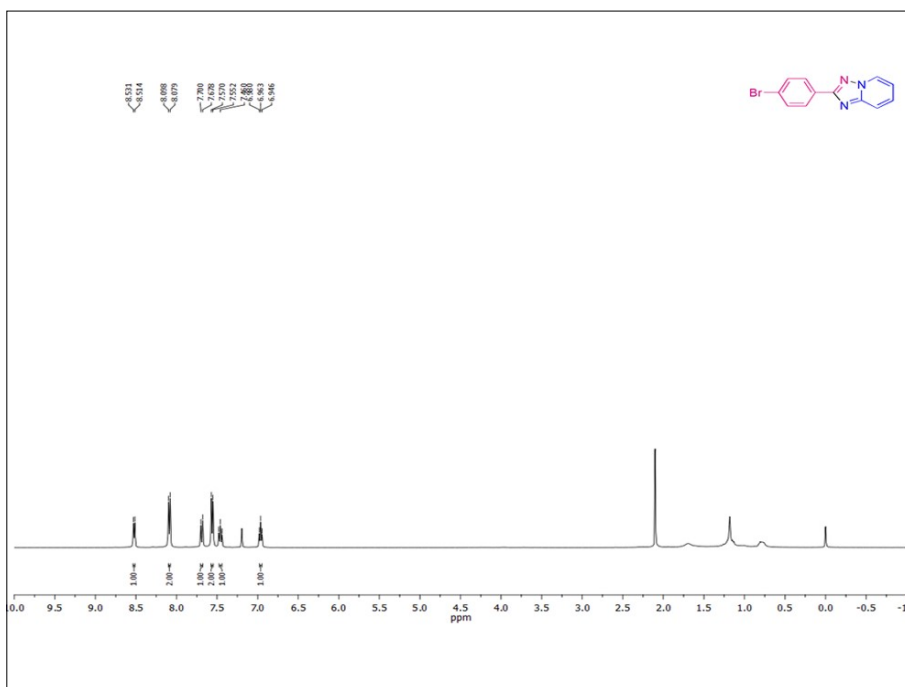

Fig. S8  $^1\text{H}$  NMR of 2-(4-Bromophenyl)-[1,2,4]triazolo[1,5-a]pyridine (3b)

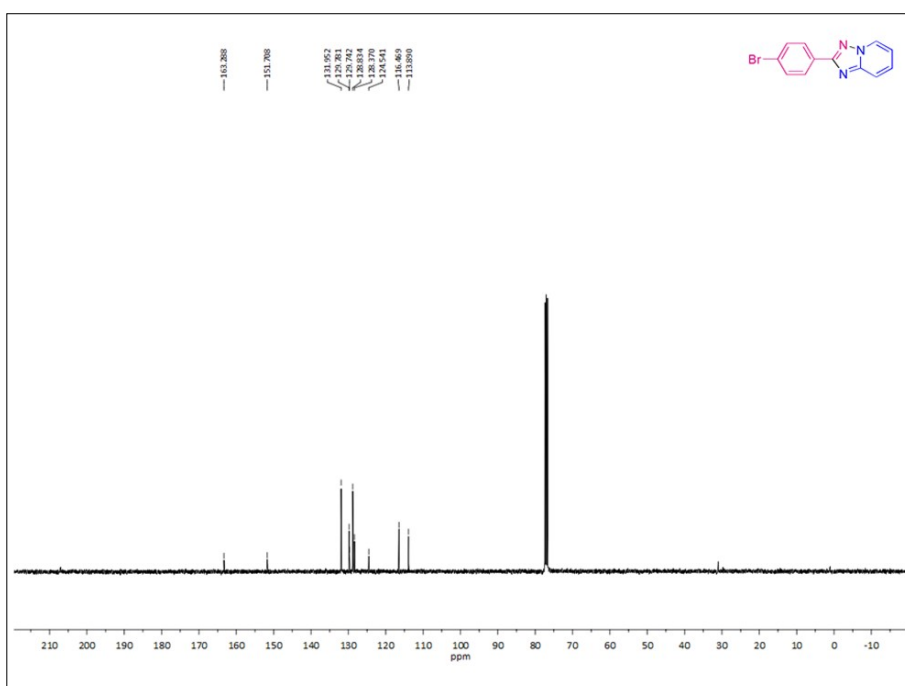

Fig. S9  $^{13}\text{C}$  NMR of 2-(4-Bromophenyl)-[1,2,4]triazolo[1,5-a]pyridine (3b)

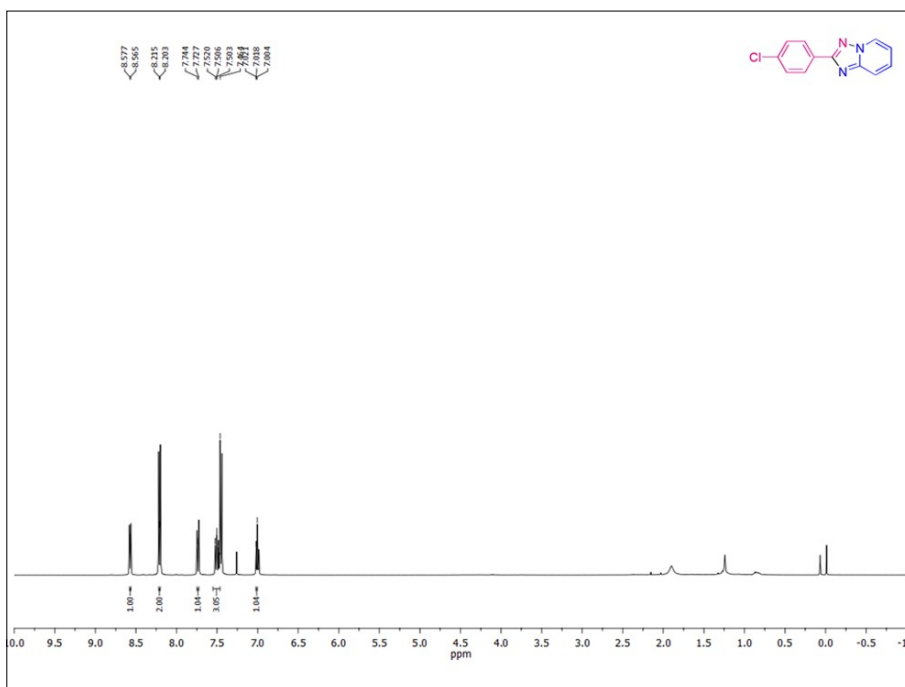

Fig. S10  $^1\text{H}$  NMR of 2-(4-Chlorophenyl)-[1,2,4]triazolo[1,5-a]pyridine (3c)

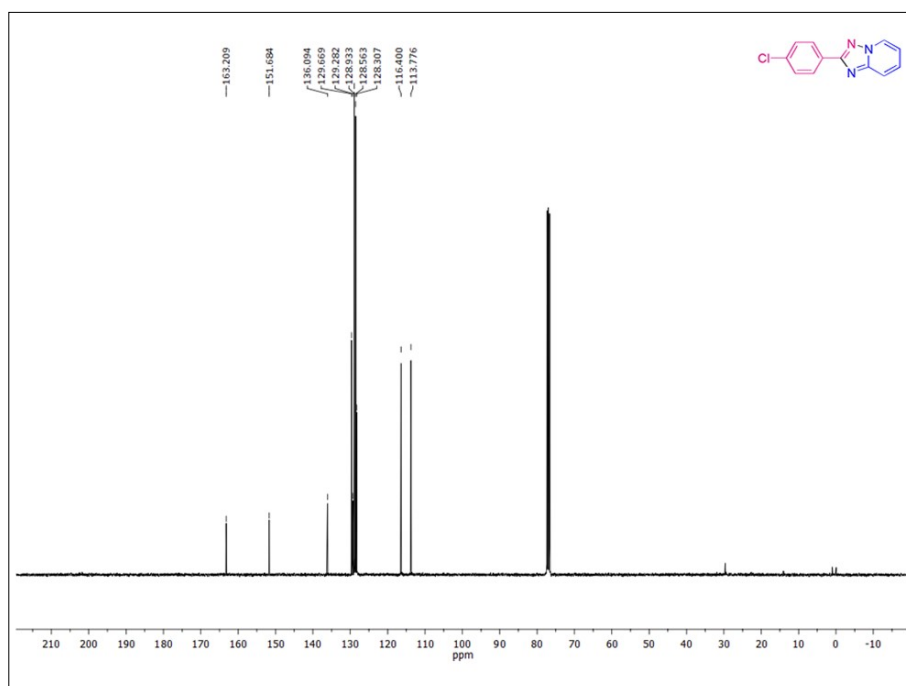

Fig. S11  $^{13}\text{C}$  NMR of 2-(4-Chlorophenyl)-[1,2,4]triazolo[1,5-a]pyridine (3c)



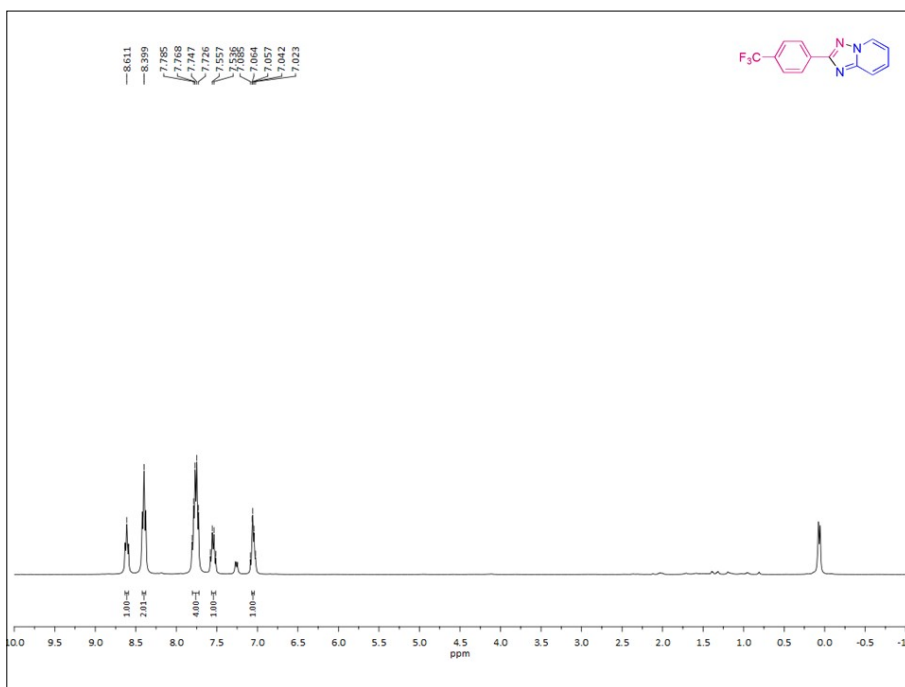

**Fig. S12** <sup>1</sup>H NMR of 2-(4-(Trifluoromethyl)phenyl)-[1,2,4]triazolo[1,5-a]pyridine (3d)

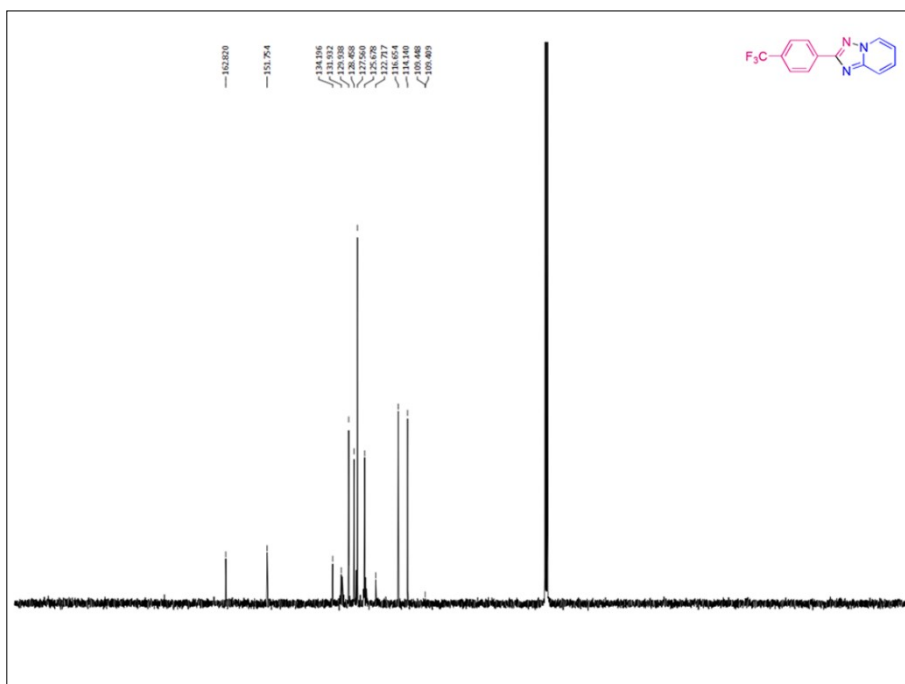

**Fig. S13** <sup>13</sup>C NMR of 2-(4-(Trifluoromethyl)phenyl)-[1,2,4]triazolo[1,5-a]pyridine (3d)

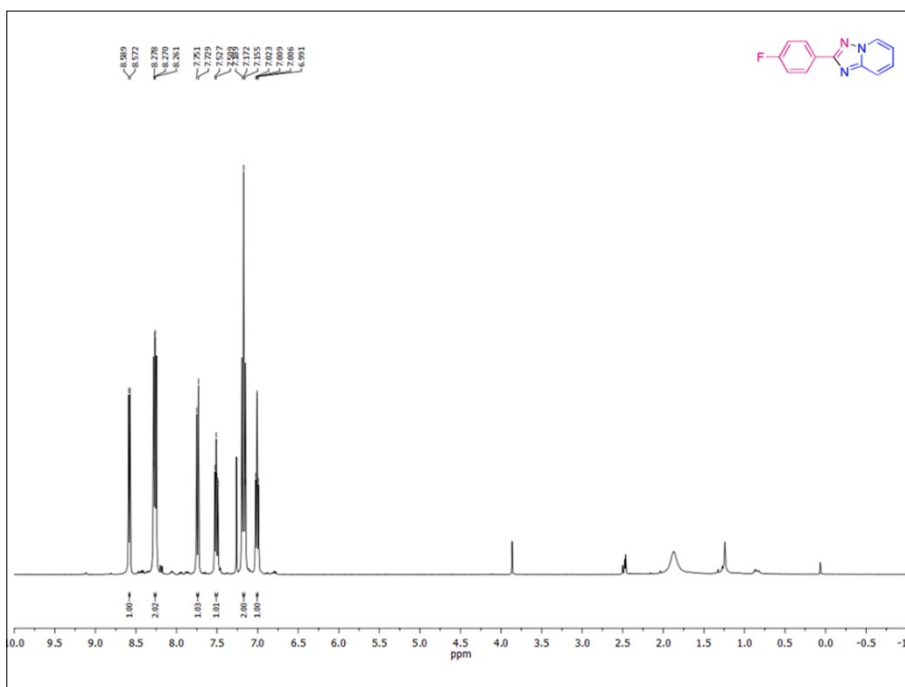

Fig. S14  $^1\text{H}$  NMR of 2-(4-Fluorophenyl)-[1,2,4]triazolo[1,5-a]pyridine (3e)

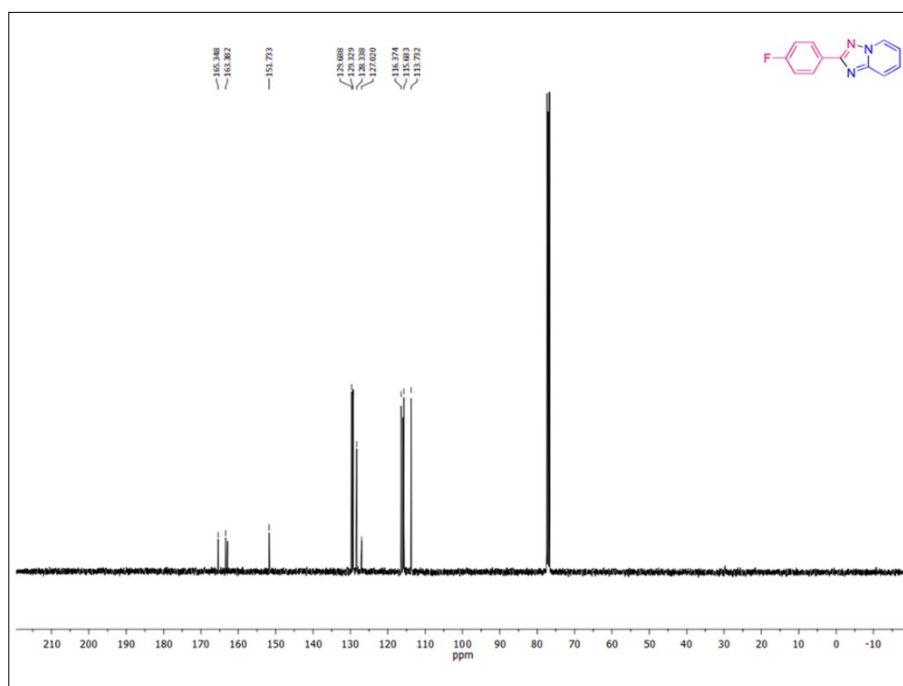

Fig. S15  $^{13}\text{C}$  NMR of 2-(4-Fluorophenyl)-[1,2,4]triazolo[1,5-a]pyridine (3e)

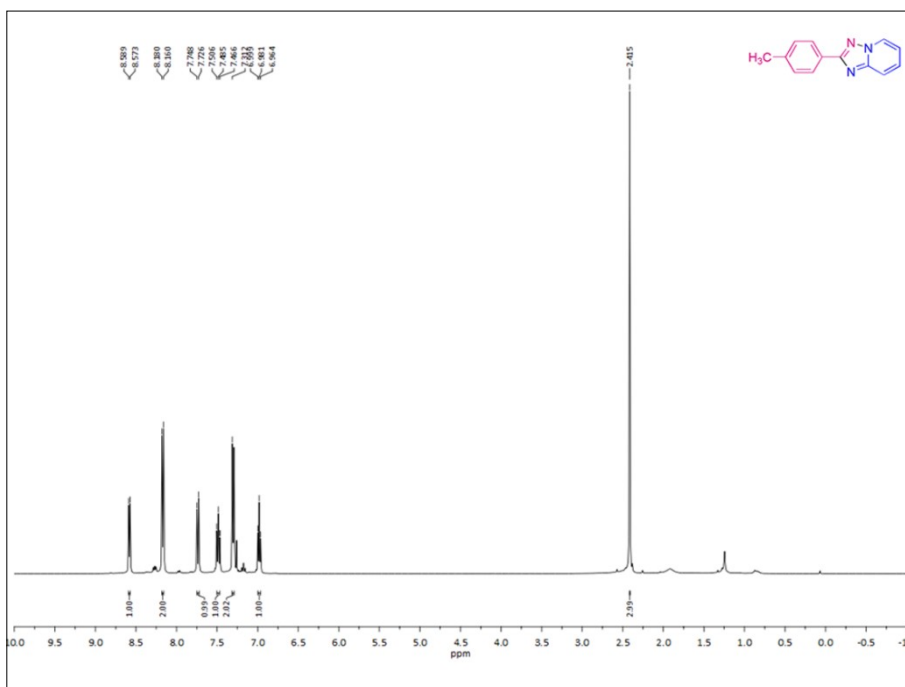

Fig. S16  $^1\text{H}$  NMR of 2-*p*-Tolyl-[1,2,4]triazolo[1,5-*a*]pyridine (3f)

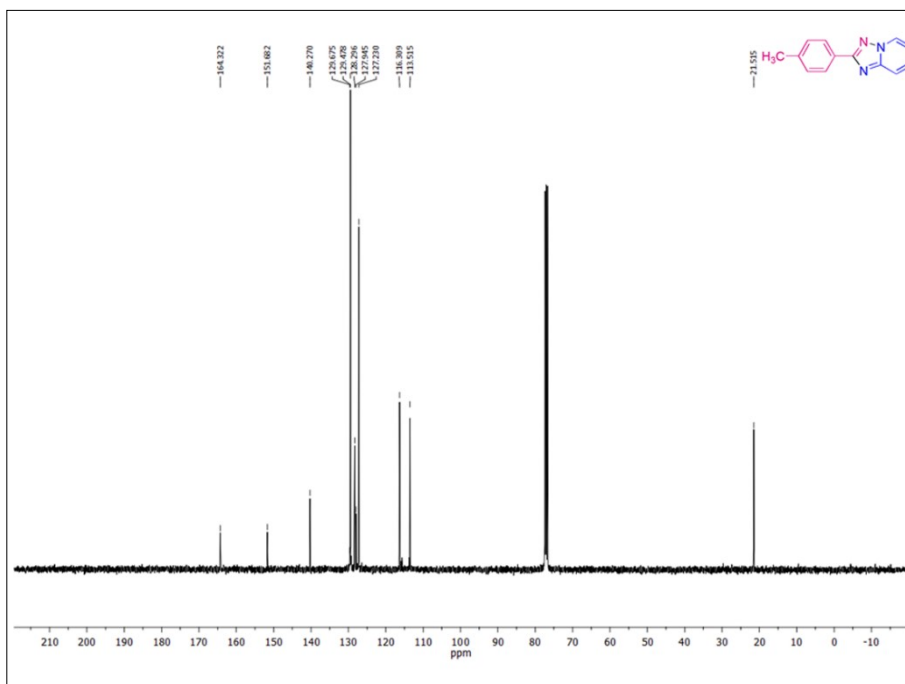

Fig. S17  $^{13}\text{C}$  NMR of 2-*p*-Tolyl-[1,2,4]triazolo[1,5-*a*]pyridine (3f)

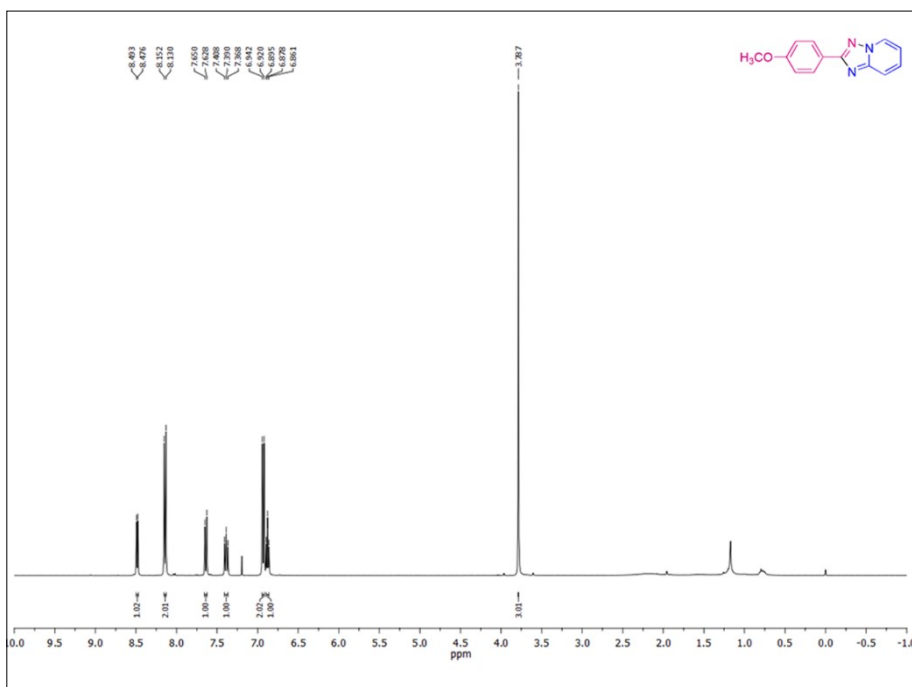

Fig. S18  $^1\text{H}$  NMR of 2-(4-Methoxyphenyl)-[1,2,4]triazolo[1,5-a]pyridine (3g)

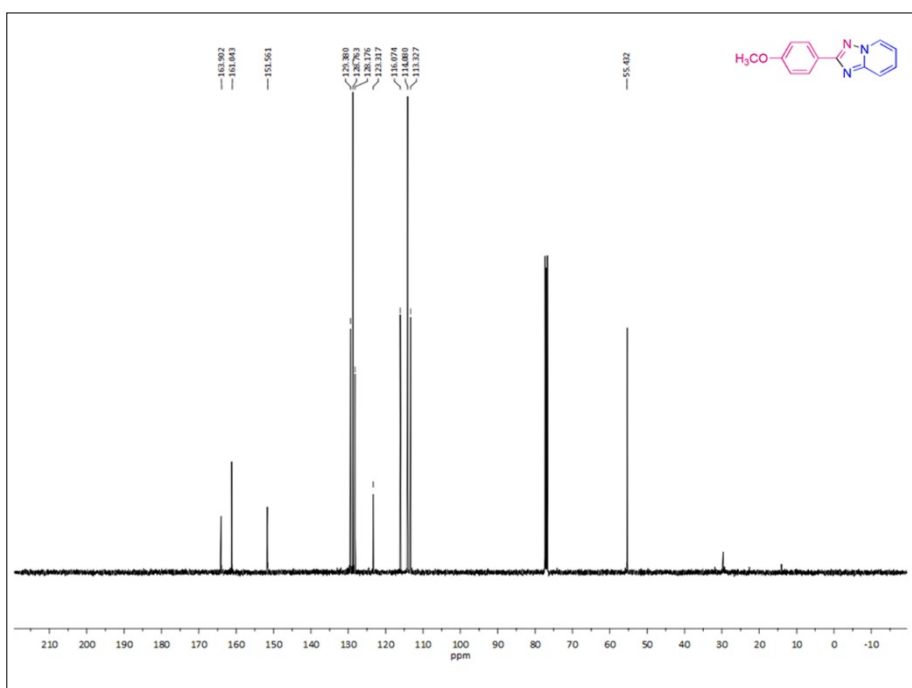

Fig. S19  $^{13}\text{C}$  NMR of 2-(4-Methoxyphenyl)-[1,2,4]triazolo[1,5-a]pyridine (3g)

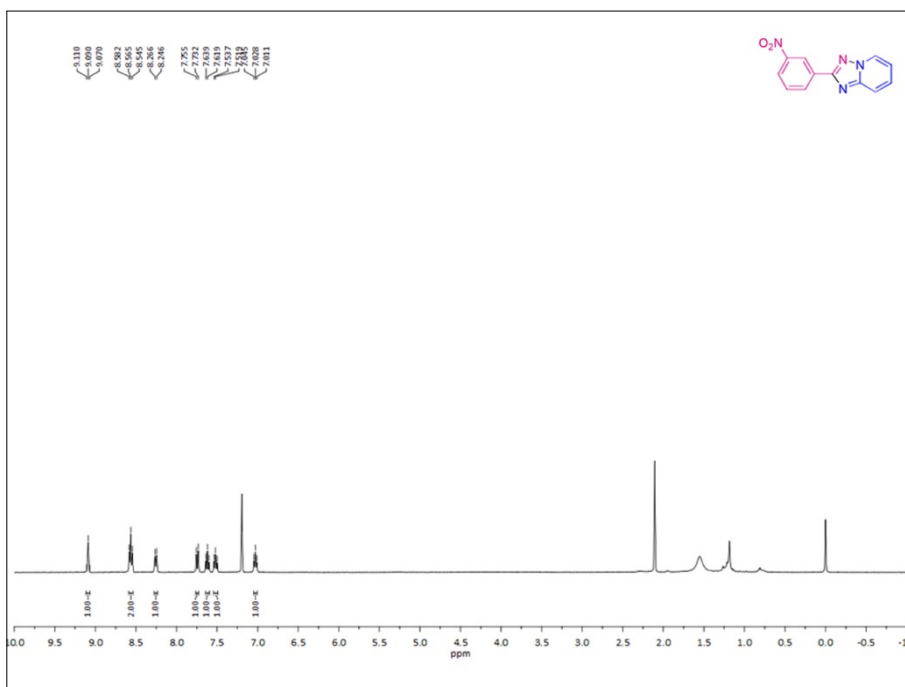

Fig. S20  $^1\text{H}$  NMR of 2-(3-Nitrophenyl)[1,2,4]triazolo[1,5-a]pyridine (3h)

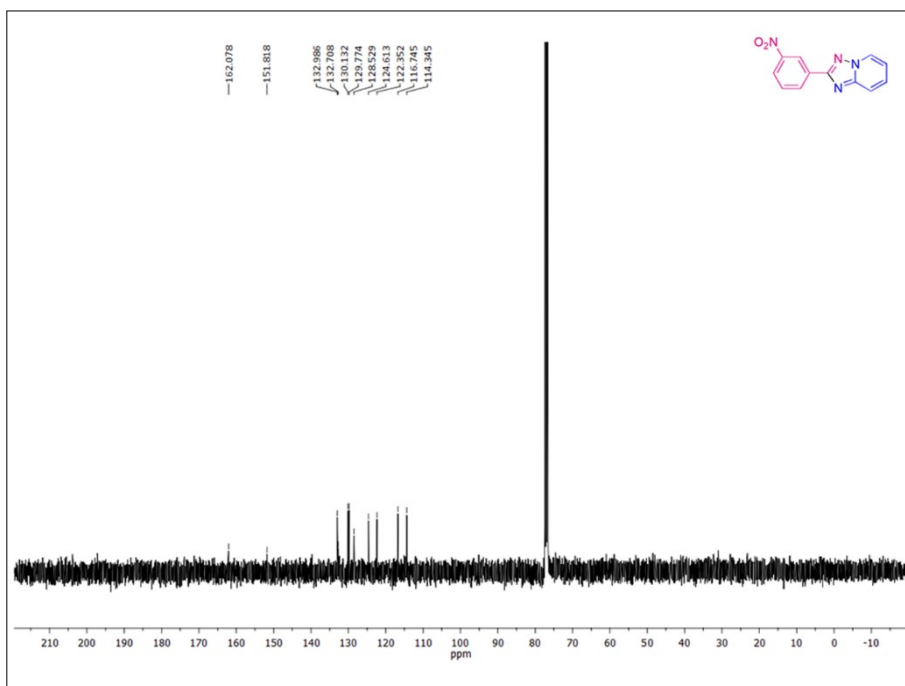

Fig. S21  $^{13}\text{C}$  NMR of 2-(3-Nitrophenyl)[1,2,4]triazolo[1,5-a]pyridine (3h)

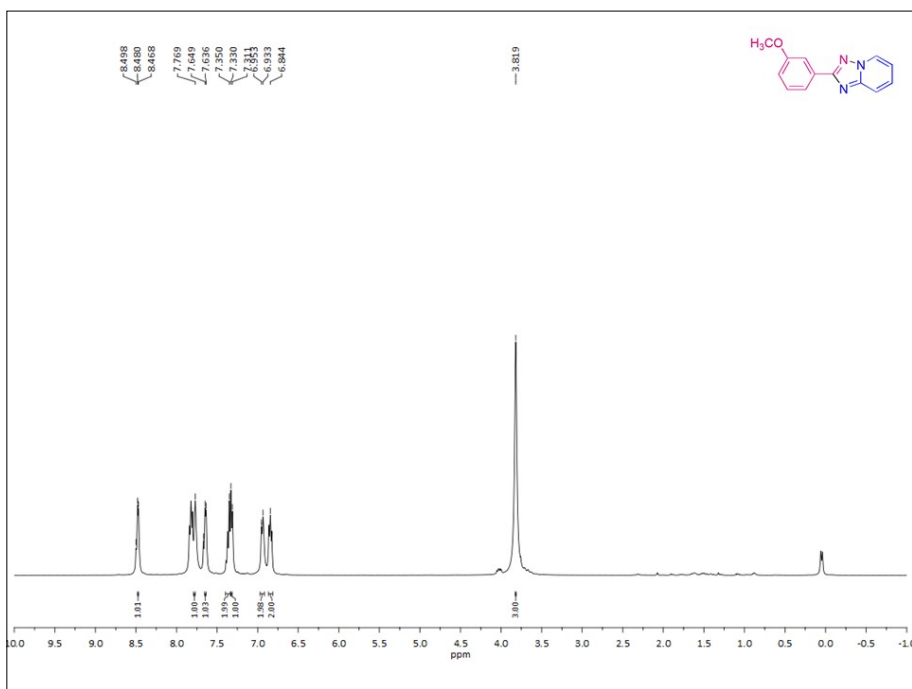

Fig. S22 <sup>1</sup>H NMR of 2-(3-Methoxyphenyl)-[1,2,4]triazolo[1,5-a]pyridine (3i)

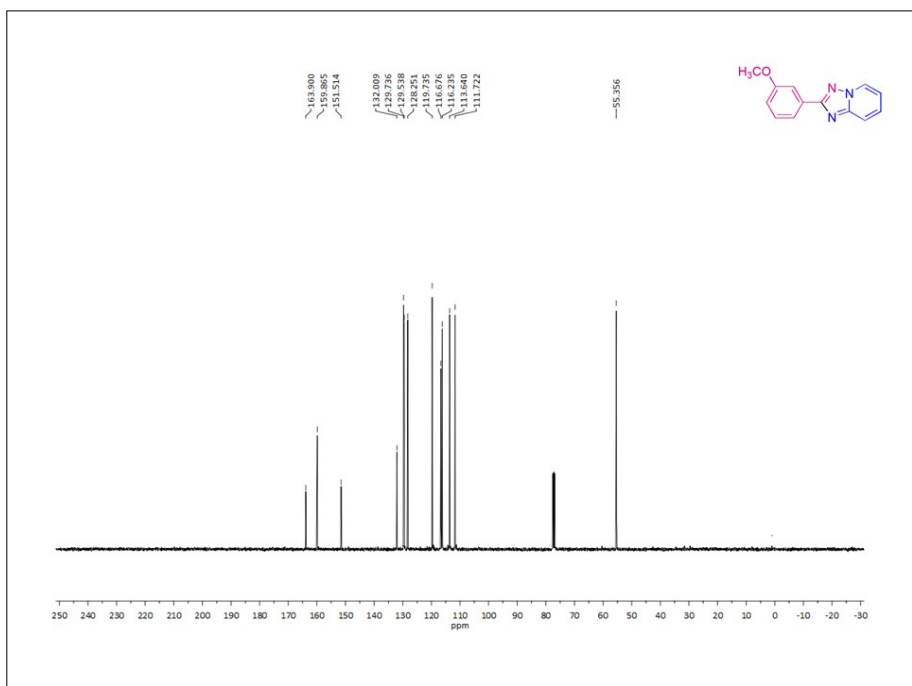

Fig. S23 <sup>13</sup>C NMR of 2-(3-Methoxyphenyl)-[1,2,4]triazolo[1,5-a]pyridine (3i)

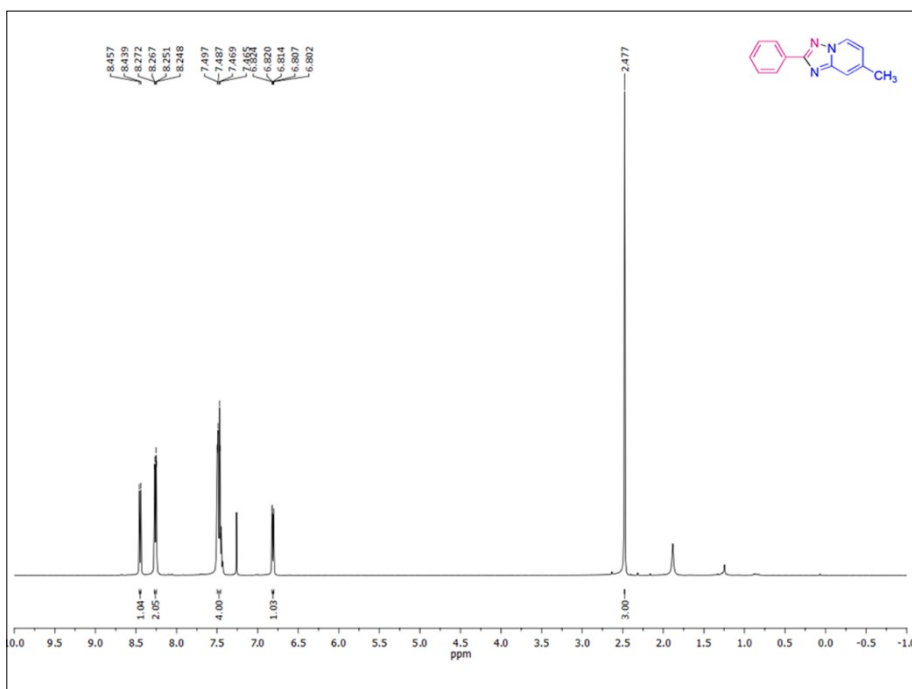

Fig. S24  $^1\text{H}$  NMR of 7-Methyl-2-phenyl[1,2,4]triazolo[1,5-*a*]pyridine (3j)

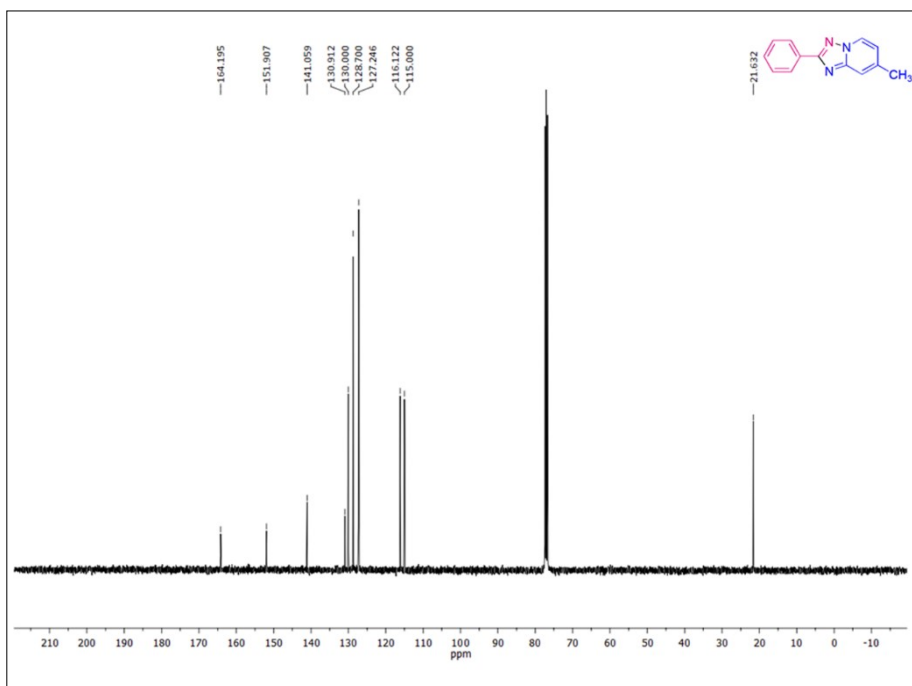

Fig. S25  $^{13}\text{C}$  NMR of 7-Methyl-2-phenyl[1,2,4]triazolo[1,5-*a*]pyridine (3j)

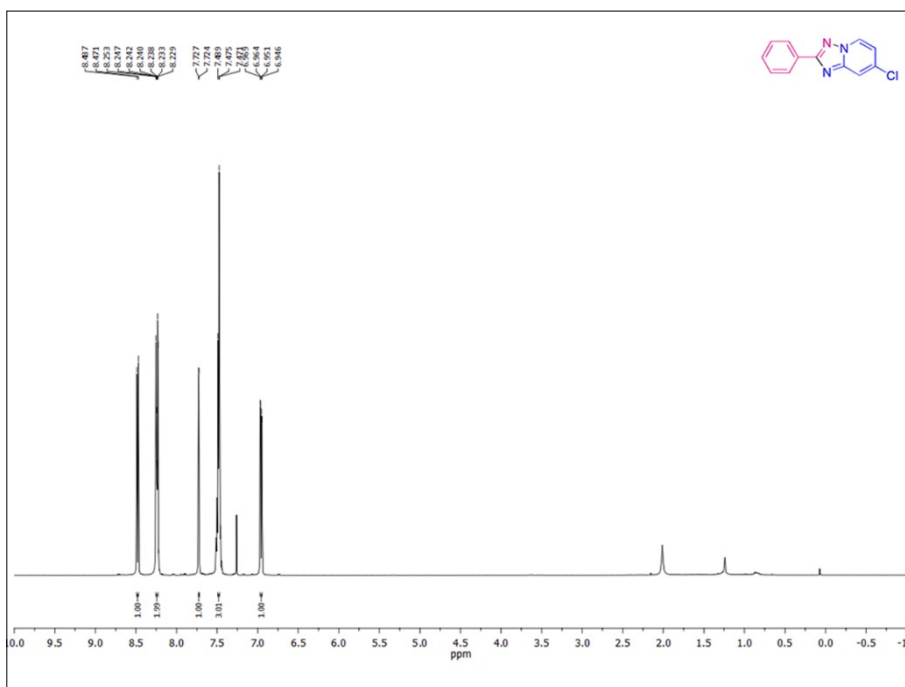

Fig. S26  $^1\text{H}$  NMR of 7-Chloro-2-phenyl-[1,2,4]triazolo[1,5-a]pyridine (3k)

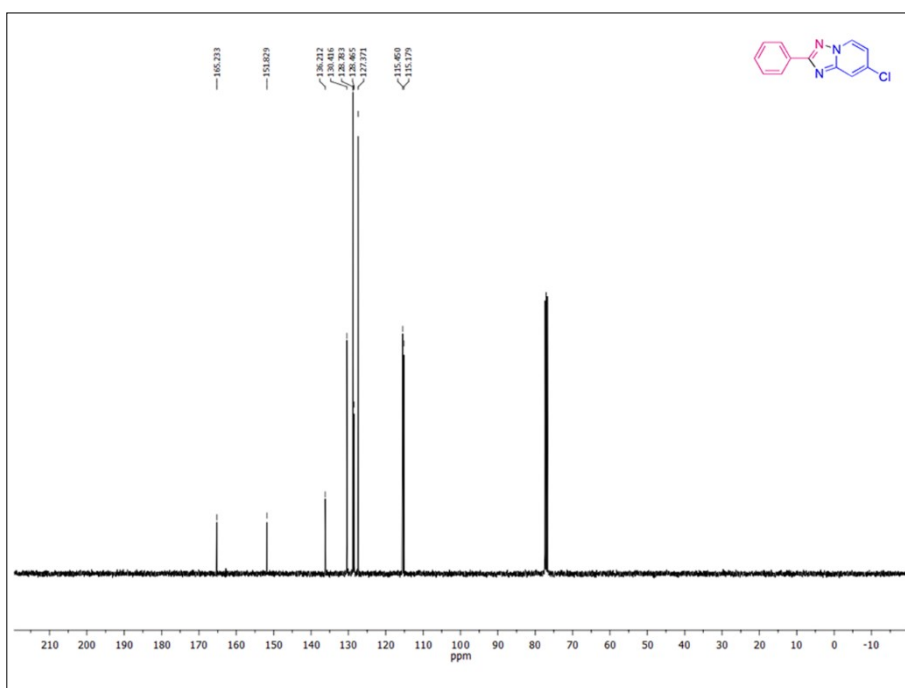

Fig. S27  $^{13}\text{C}$  NMR of 7-Chloro-2-phenyl-[1,2,4]triazolo[1,5-a]pyridine (3k)



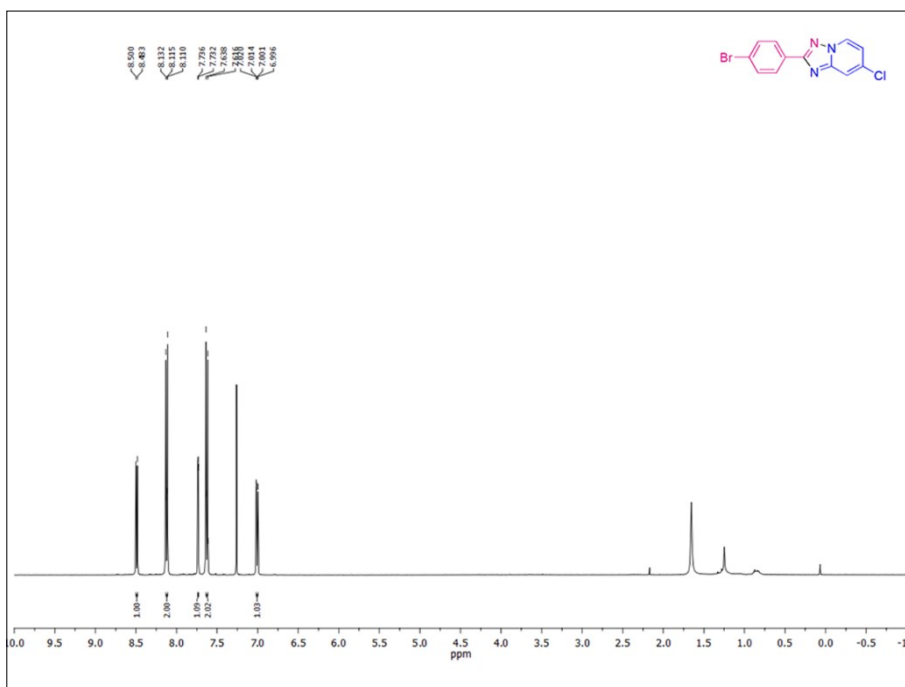

Fig. S28 <sup>1</sup>H NMR of 2-(4-Bromophenyl)-7-chloro-[1,2,4]triazolo[1,5-a]pyridine (3l)

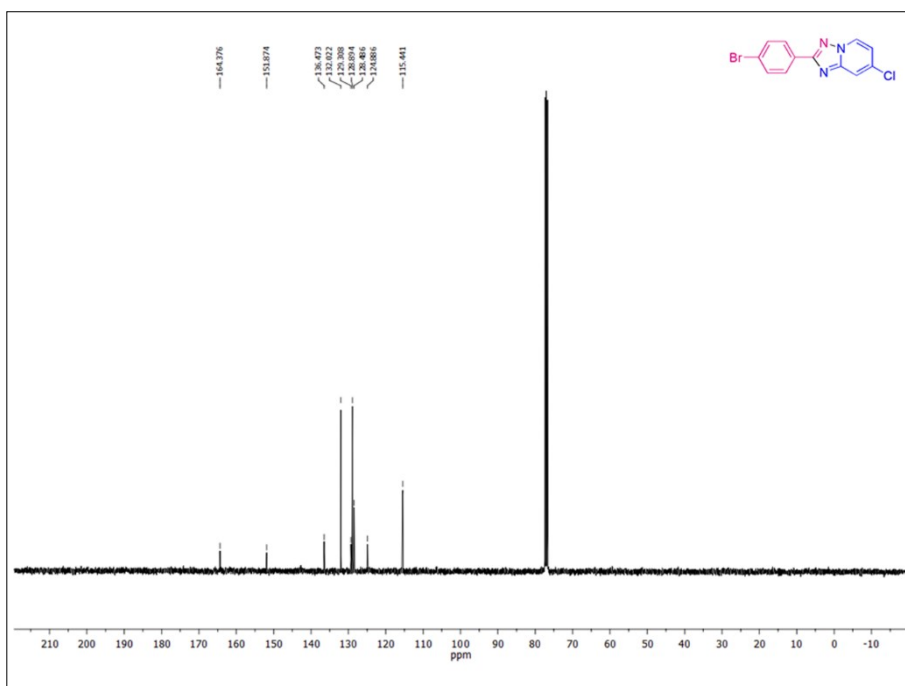

Fig. S29 <sup>13</sup>C NMR of 2-(4-Bromophenyl)-7-chloro-[1,2,4]triazolo[1,5-a]pyridine (3l)

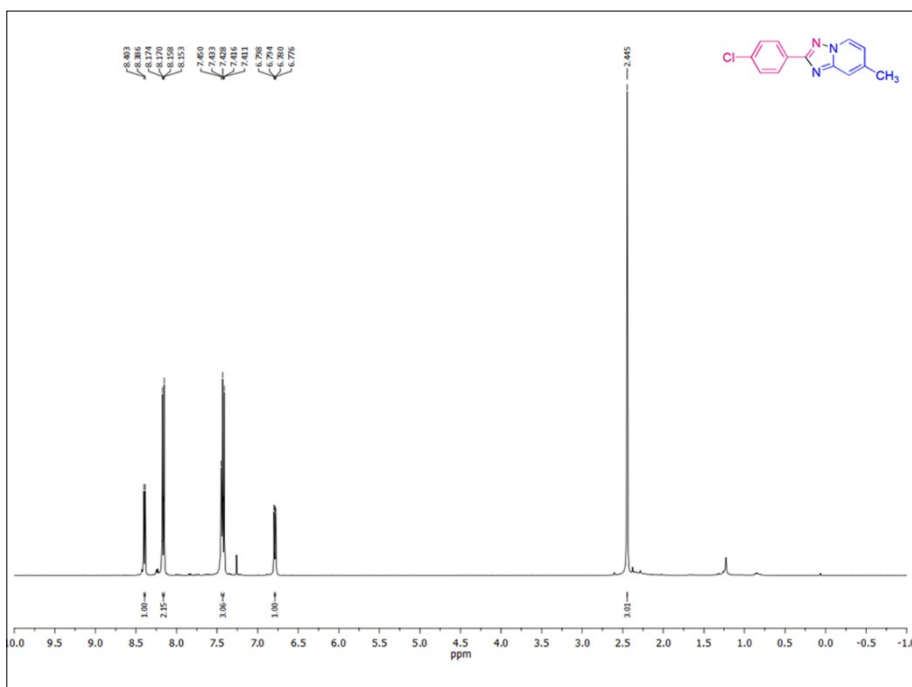

Fig. S30 <sup>1</sup>H NMR of 2-(4-Chlorophenyl)-7-methyl[1,2,4]triazolo[1,5-*a*]pyridine (3m)

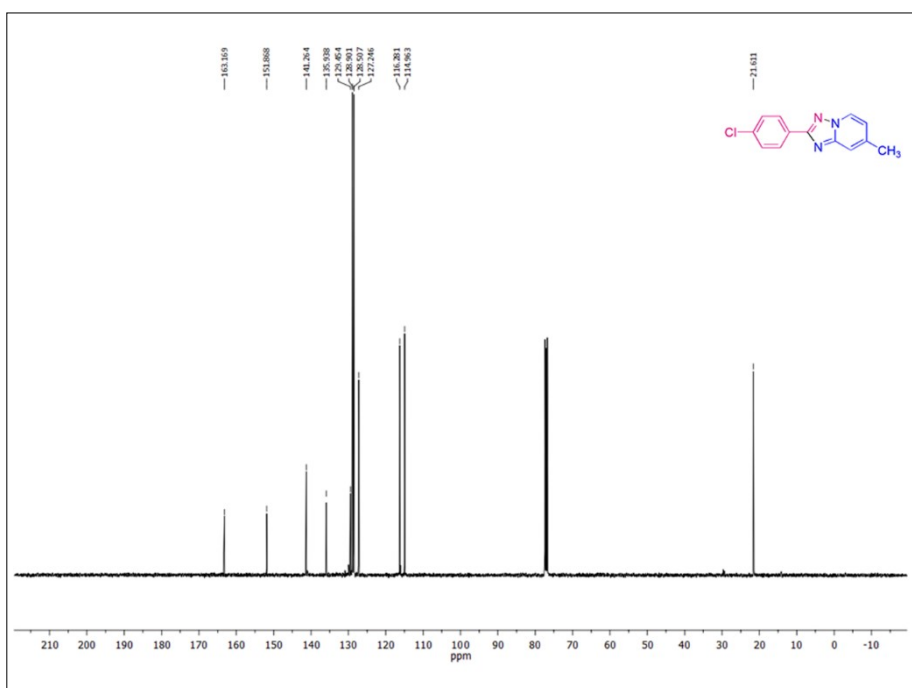

Fig. S31 <sup>13</sup>C NMR of 2-(4-Chlorophenyl)-7-methyl[1,2,4]triazolo[1,5-*a*]pyridine (3m)

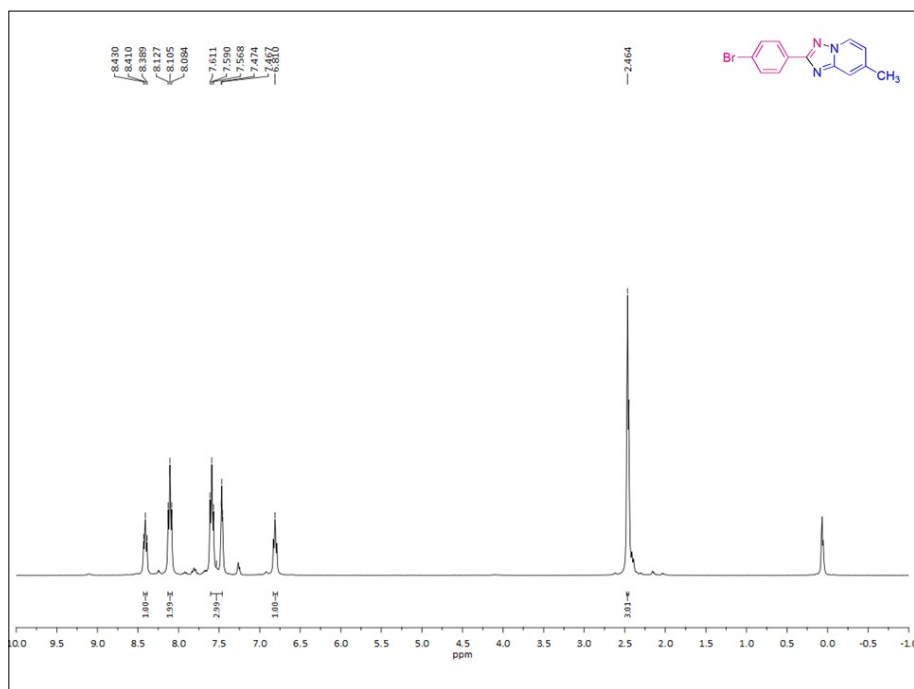

Fig. S32 <sup>1</sup>H NMR of 2-(4-Bromophenyl)-7-methyl[1,2,4]triazolo[1,5-*a*]pyridine (3n)

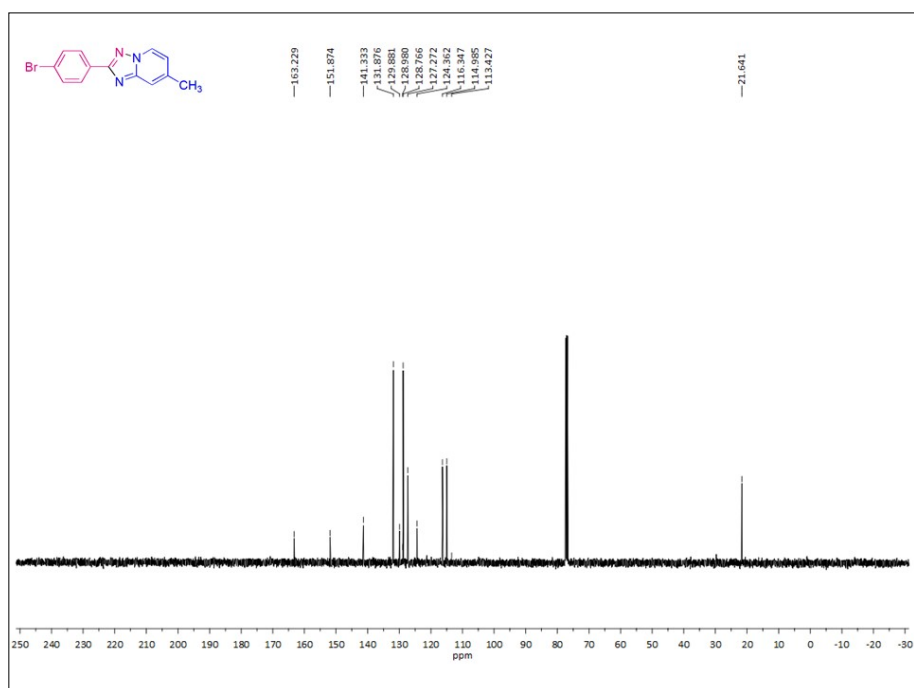

Fig. S33 <sup>13</sup>C NMR of 2-(4-Bromophenyl)-7-methyl[1,2,4]triazolo[1,5-*a*]pyridine (3n)

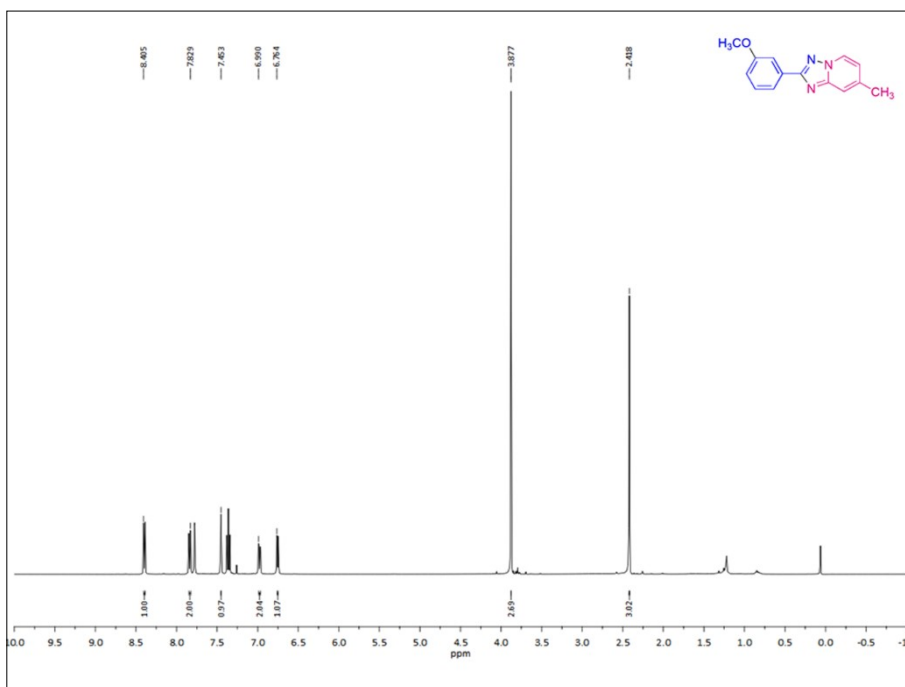

Fig. S34  $^1\text{H}$  NMR of 2-(3-Methoxyphenyl)-7-methyl[1,2,4]triazolo[1,5-a]pyridine (3o)

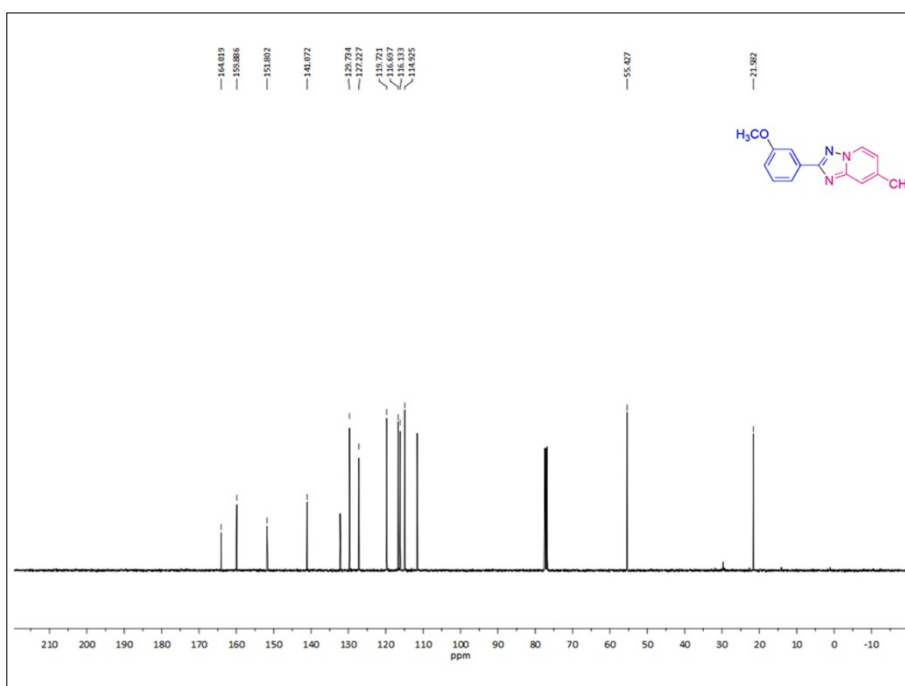

Fig. S35  $^{13}\text{C}$  NMR of 2-(3-Methoxyphenyl)-7-methyl[1,2,4]triazolo[1,5-a]pyridine (3o)

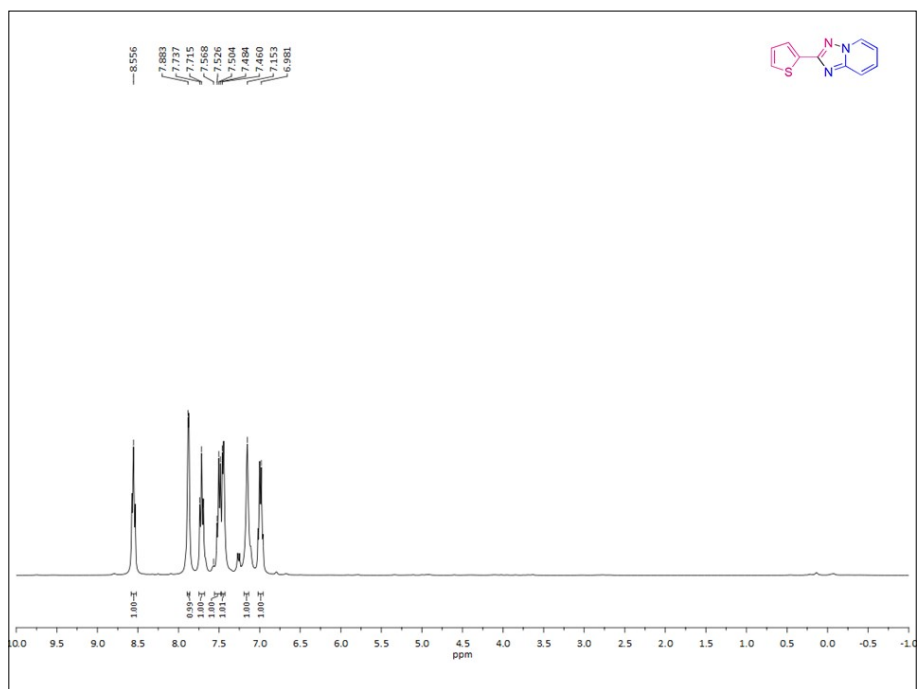

**Fig. S36**  $^1\text{H}$  NMR of 2-(2-Thiophenyl)-[1,2,4]triazolo[1,5-a]pyridine (3p)

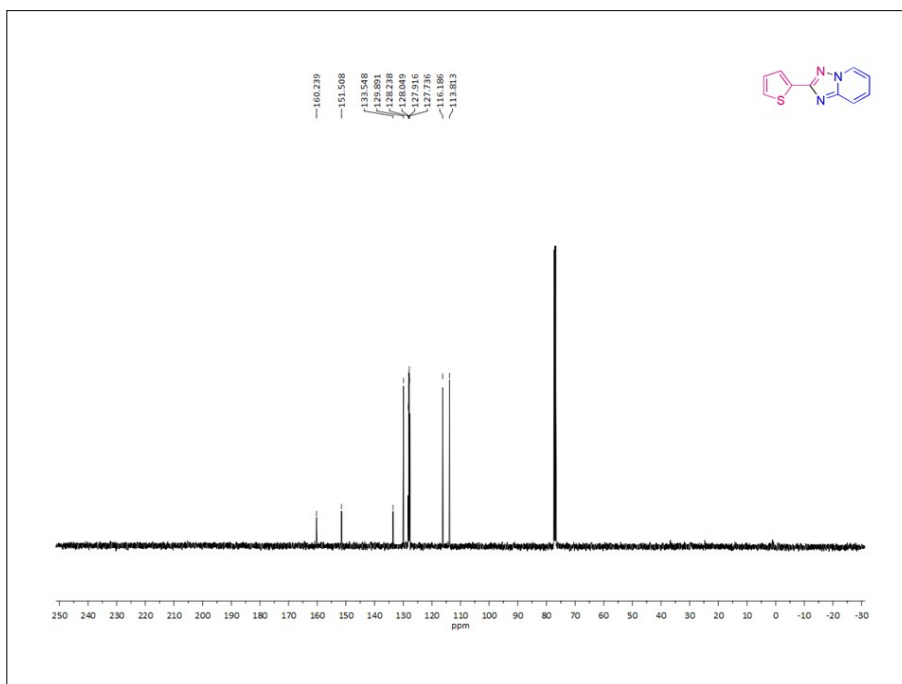

**Fig. S37**  $^{13}\text{C}$  NMR of 2-(2-Thiophenyl)-[1,2,4]triazolo[1,5-a]pyridine (3p)

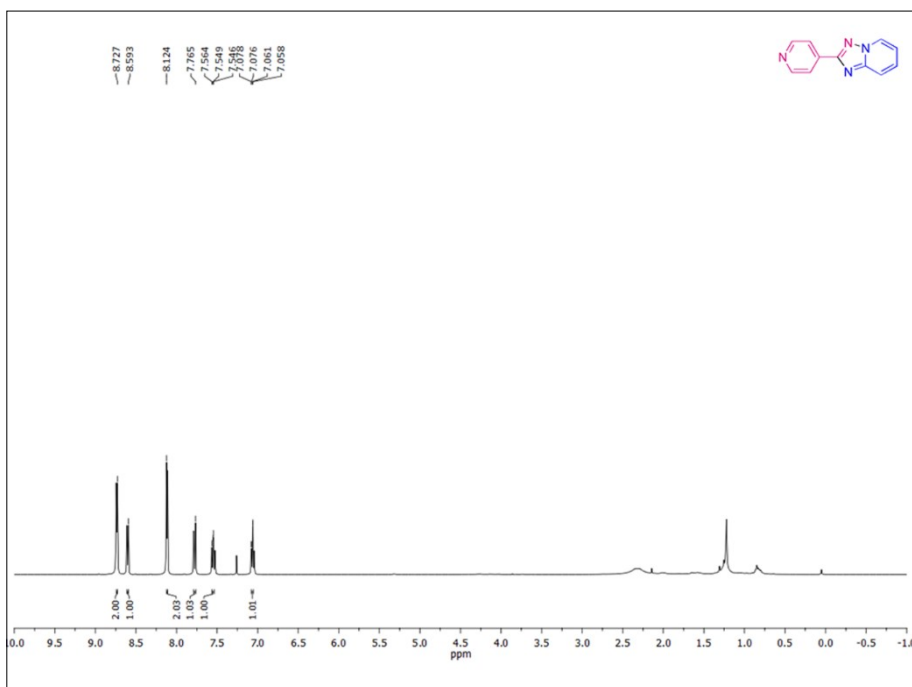

Fig. S38  $^1\text{H}$  NMR of 2-(Pyridin-4-yl)-[1,2,4]triazolo[1,5-a]pyridine (3q)

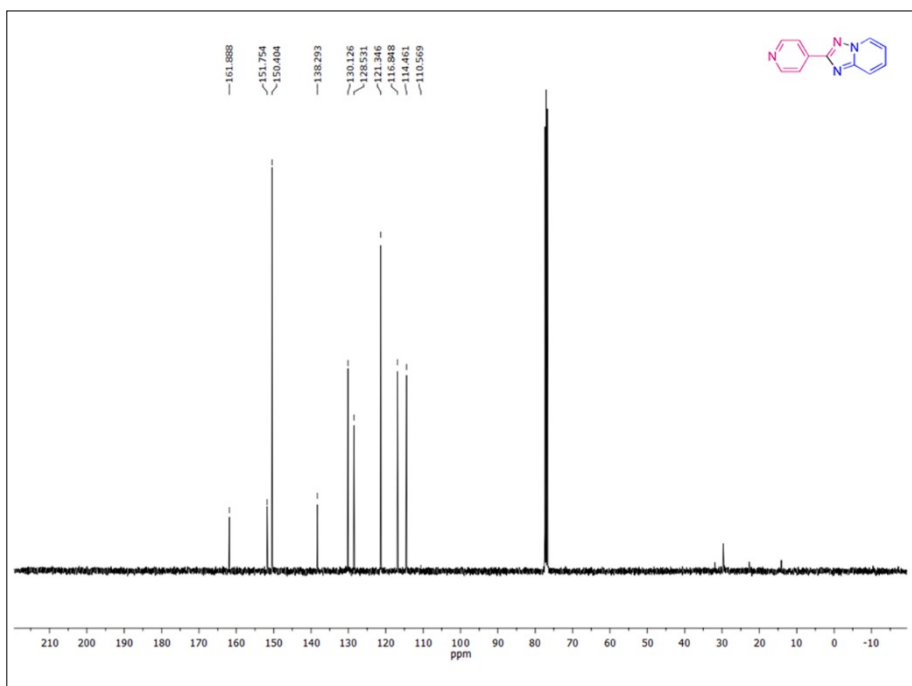

Fig. S39  $^{13}\text{C}$  NMR of 2-(Pyridin-4-yl)-[1,2,4]triazolo[1,5-a]pyridine (3q)

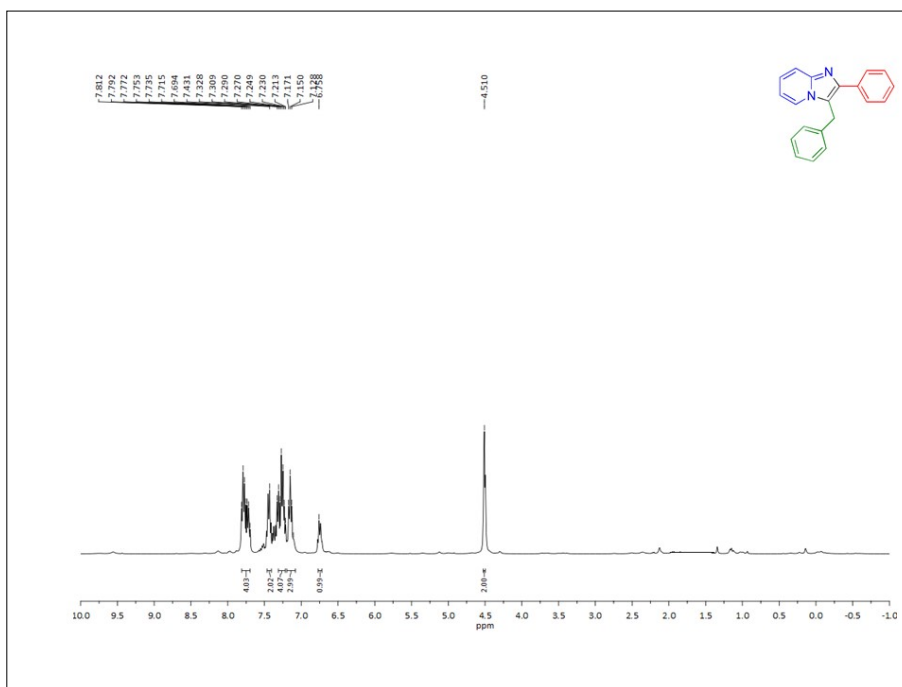

Fig. S40 <sup>1</sup>H NMR of 3-Benzyl-2-phenylimidazo[1,2-*a*]pyridine (4a)

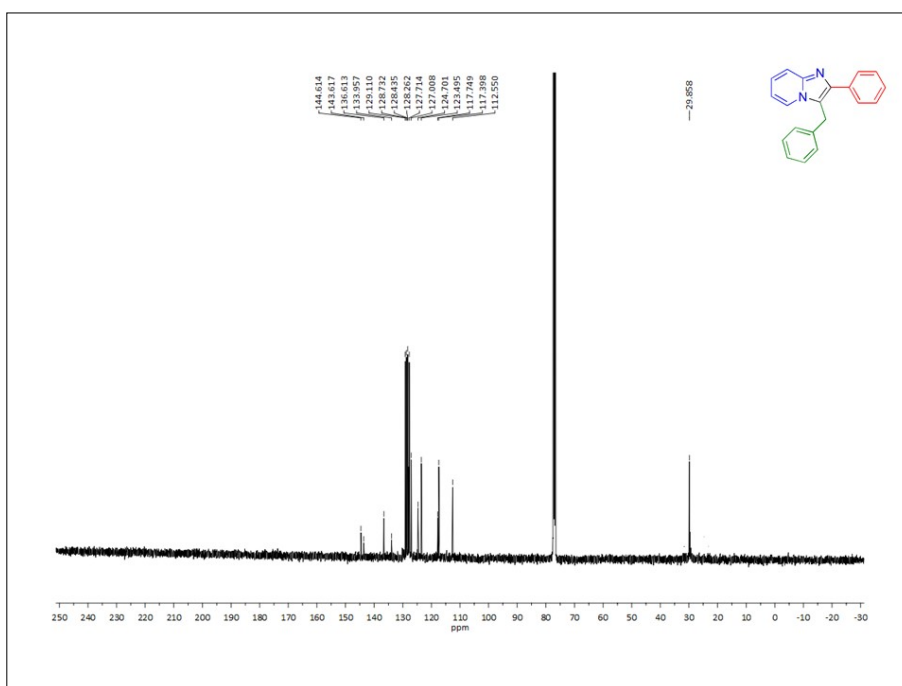

Fig. S41 <sup>13</sup>C NMR of 3-Benzyl-2-phenylimidazo[1,2-*a*]pyridine (4a)





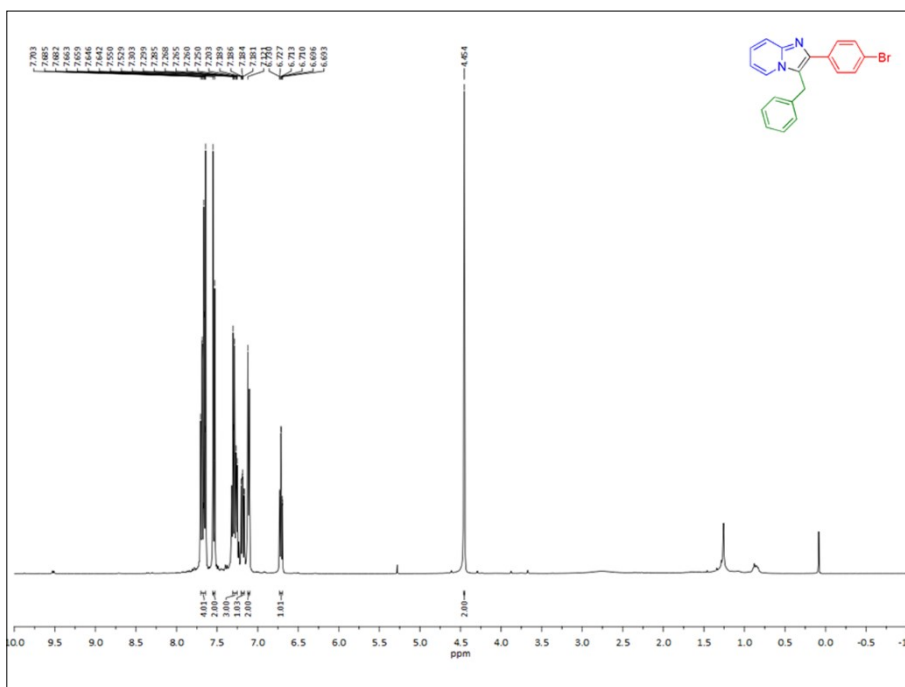

Fig. S44 <sup>1</sup>H NMR of 3-benzyl-2-(4-bromophenyl)H-imidazo[1,2-a]pyridine (4c)

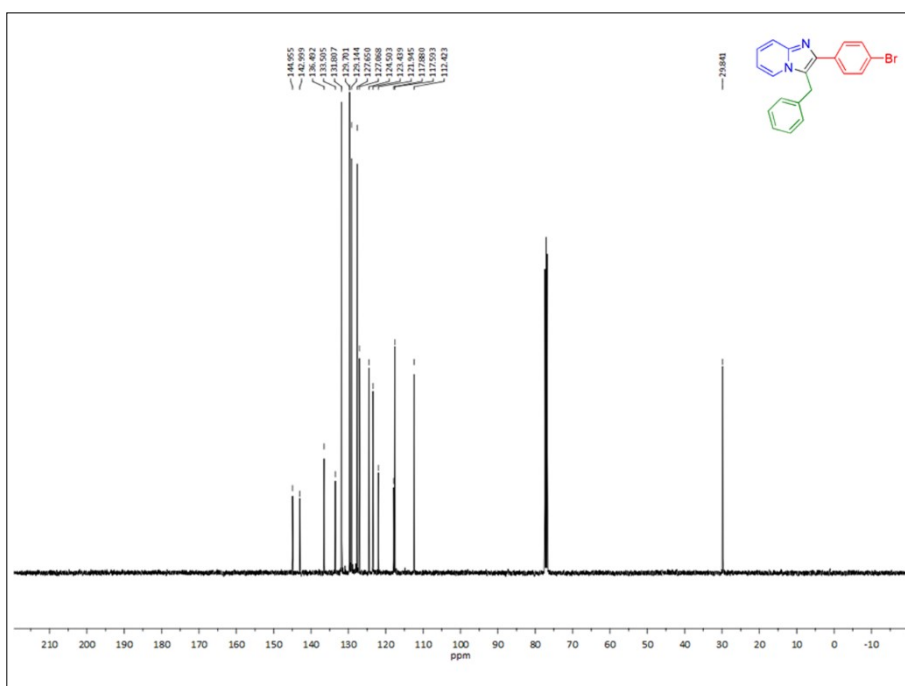

Fig. S45 <sup>13</sup>C NMR of 3-benzyl-2-(4-bromophenyl)H-imidazo[1,2-a]pyridine (4c)

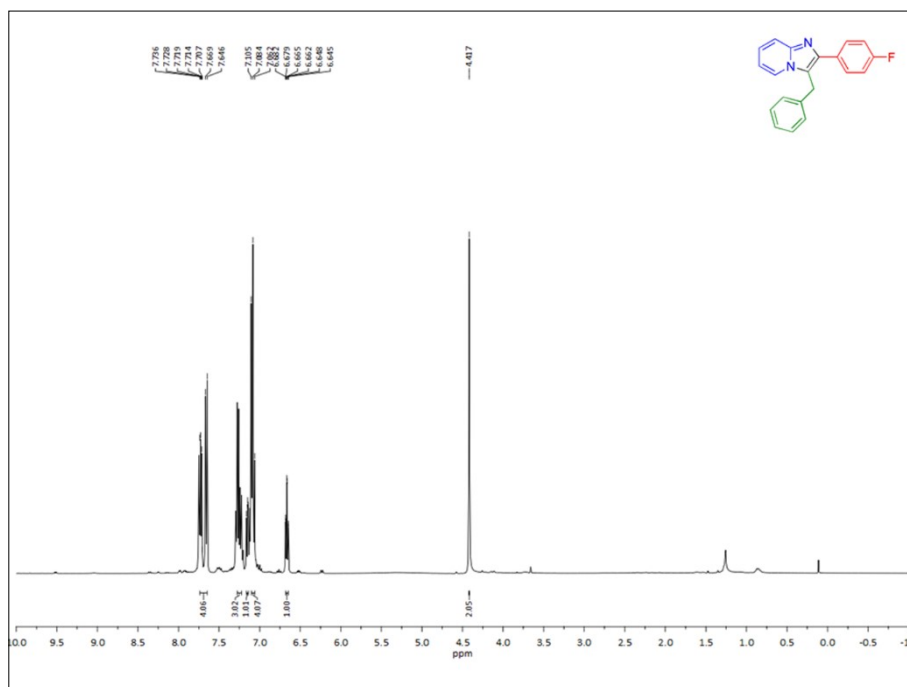

Fig. S46  $^1\text{H}$  NMR of 3-Benzyl-2-(4-fluorophenyl)imidazo[1,2-a]pyridine (4d)

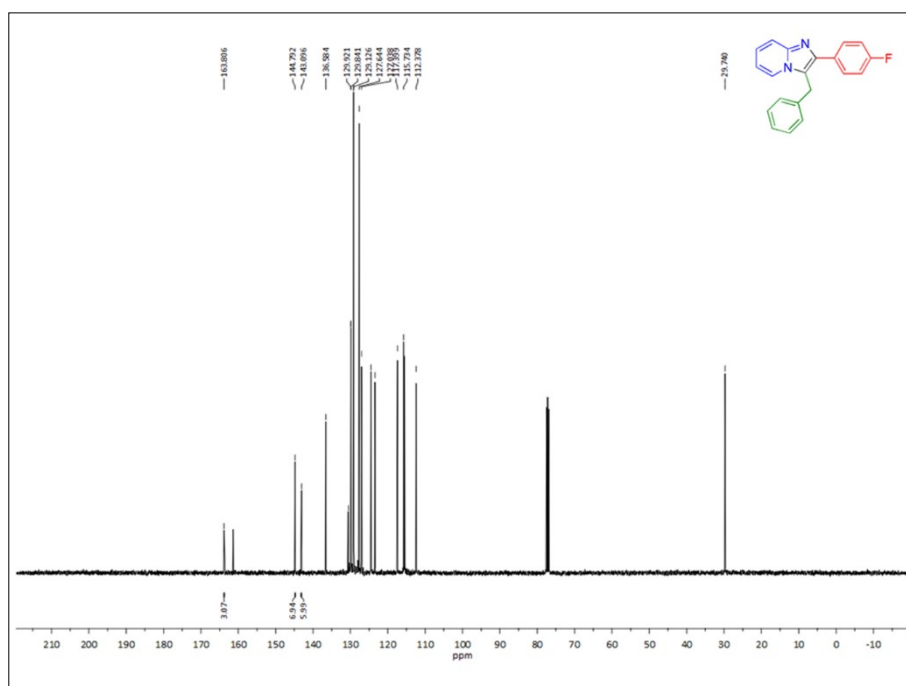

Fig. S47  $^{13}\text{C}$  NMR of 3-Benzyl-2-(4-fluorophenyl)imidazo[1,2-a]pyridine (4d)

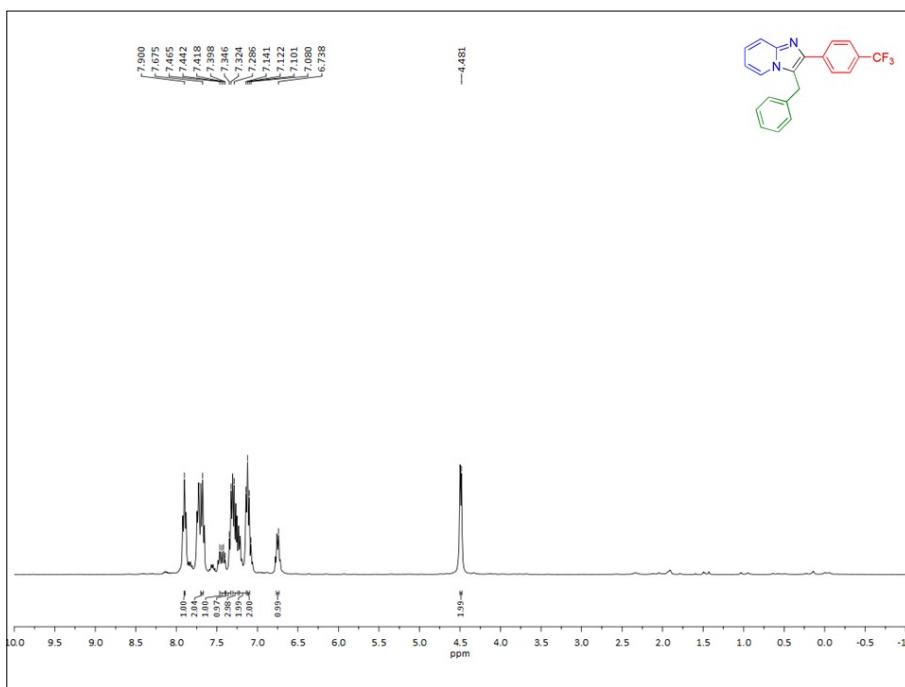

Fig. S48  $^1\text{H}$  NMR of 3-benzyl-2-(4-(trifluoromethyl)phenyl)imidazo[1,2-a]pyridine (4e)

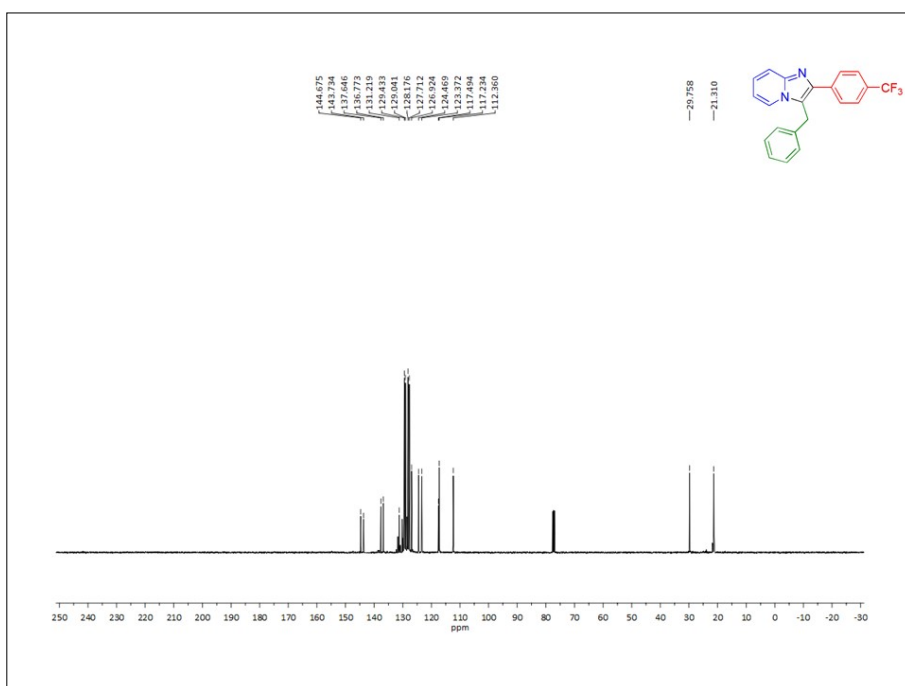

Fig. S49  $^{13}\text{C}$  NMR of 3-benzyl-2-(4-(trifluoromethyl)phenyl)imidazo[1,2-a]pyridine (4e)

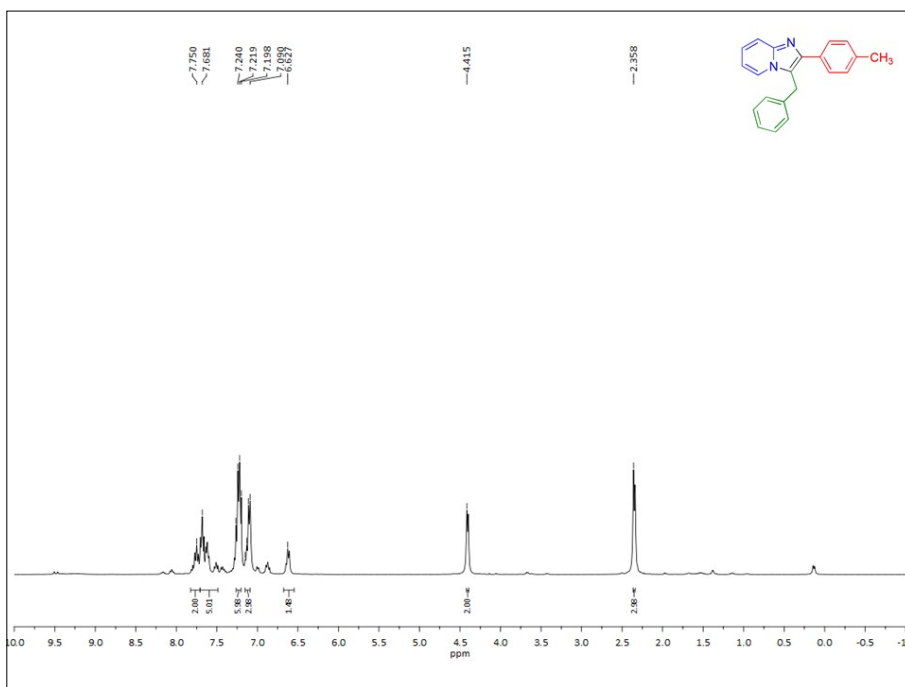

Fig. S50 <sup>1</sup>H NMR of 3-Benzyl-2-*p*-tolylimidazo[1,2-*a*]pyridine (4f)

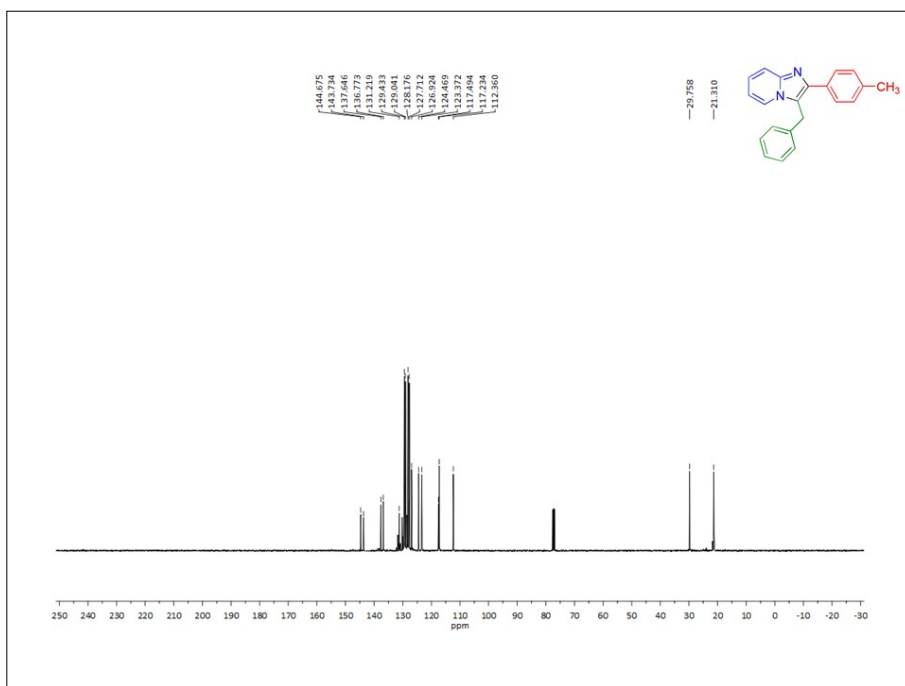

Fig. S51 <sup>13</sup>C NMR of 3-Benzyl-2-*p*-tolylimidazo[1,2-*a*]pyridine (4f)

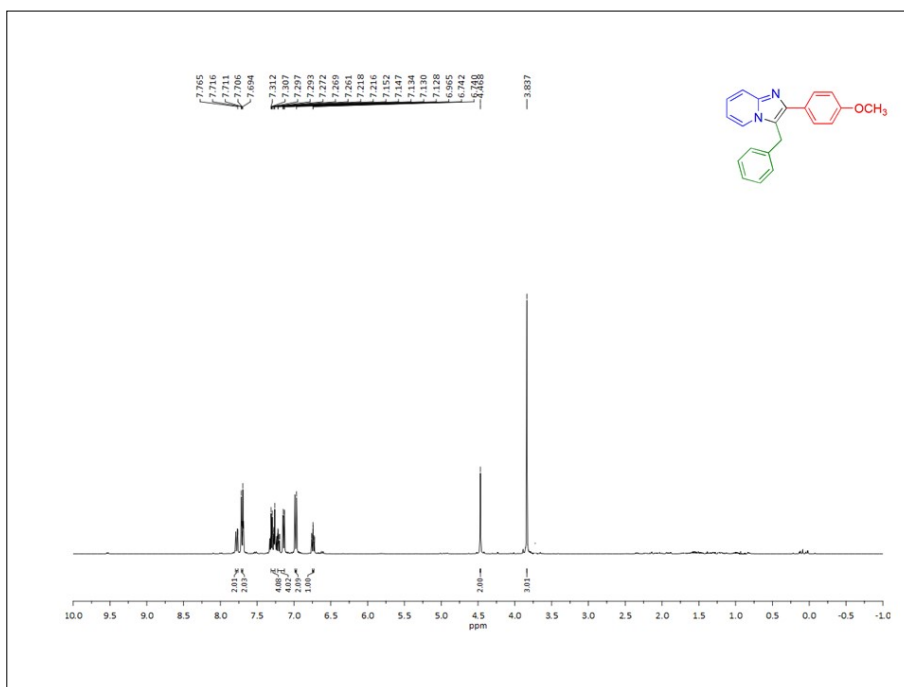

Fig. S52 <sup>1</sup>H NMR of 3-benzyl-2-(4-methoxyphenyl)imidazo[1,2-a]pyridine (4g)

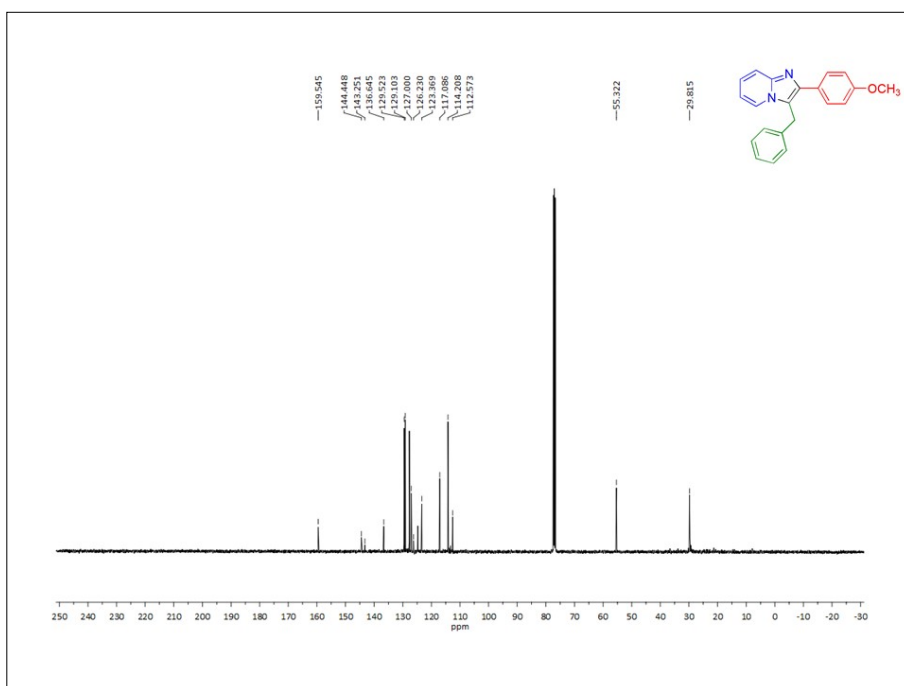

Fig. S53 <sup>13</sup>C NMR of 3-benzyl-2-(4-methoxyphenyl)imidazo[1,2-a]pyridine (4g)

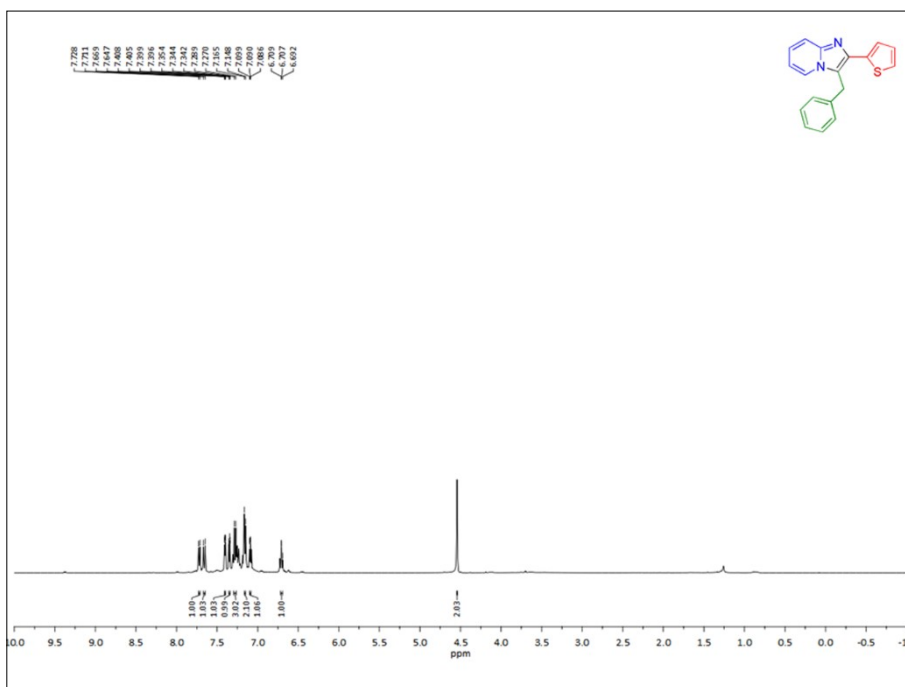

Fig. S54 <sup>1</sup>H NMR of 3-Benzyl-2-(2-thiophenyl)imidazo[1,2-*a*]pyridine (4h)

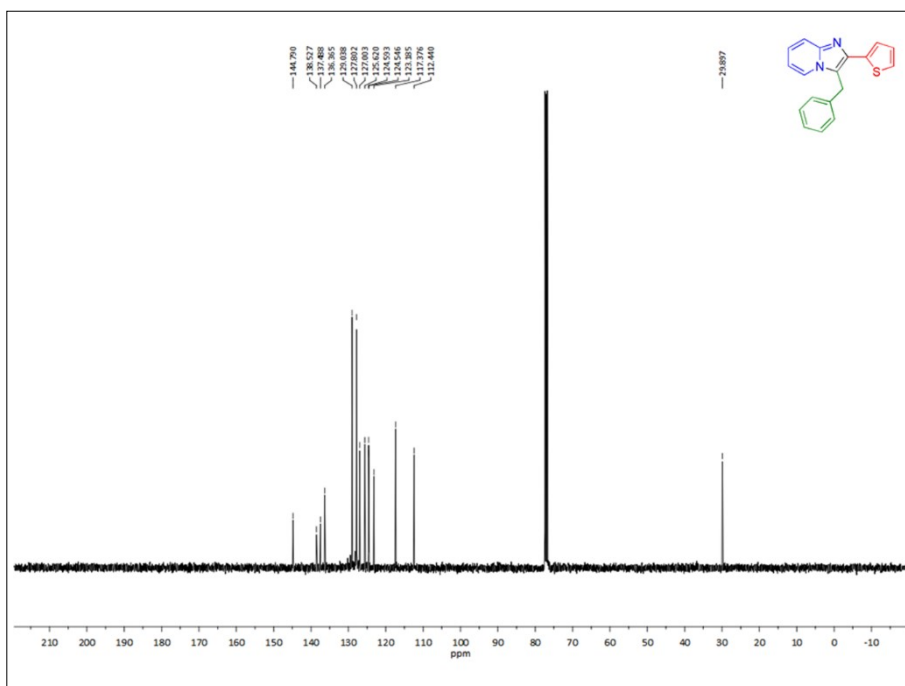

Fig. S55 <sup>13</sup>C NMR of 3-Benzyl-2-(2-thiophenyl)imidazo[1,2-*a*]pyridine (4h)

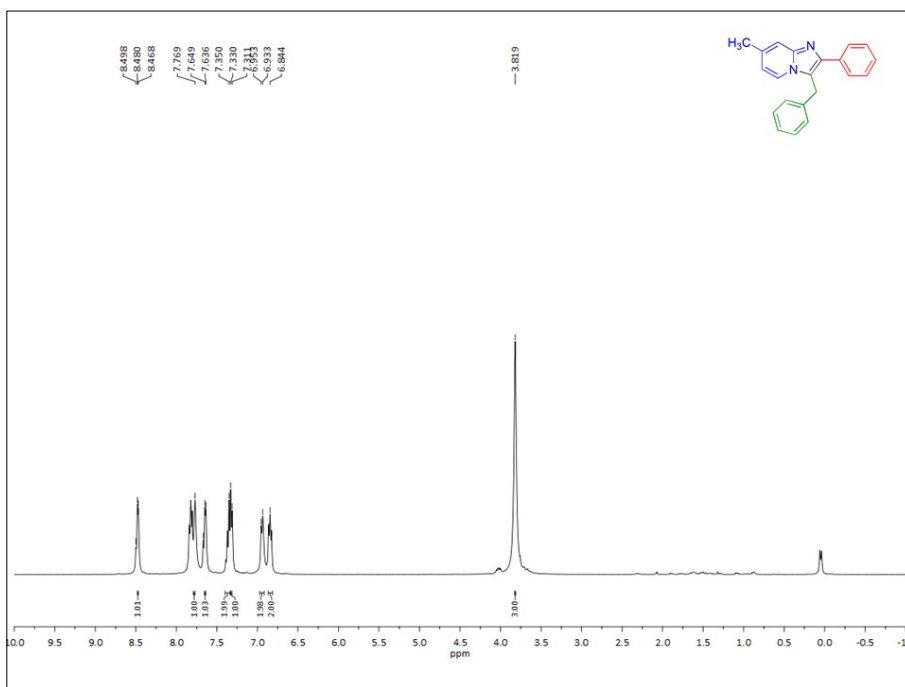

Fig. S56 <sup>1</sup>H NMR of 3-Benzyl-7-methyl-2-phenylimidazo[1,2-*a*]pyridine (4i)

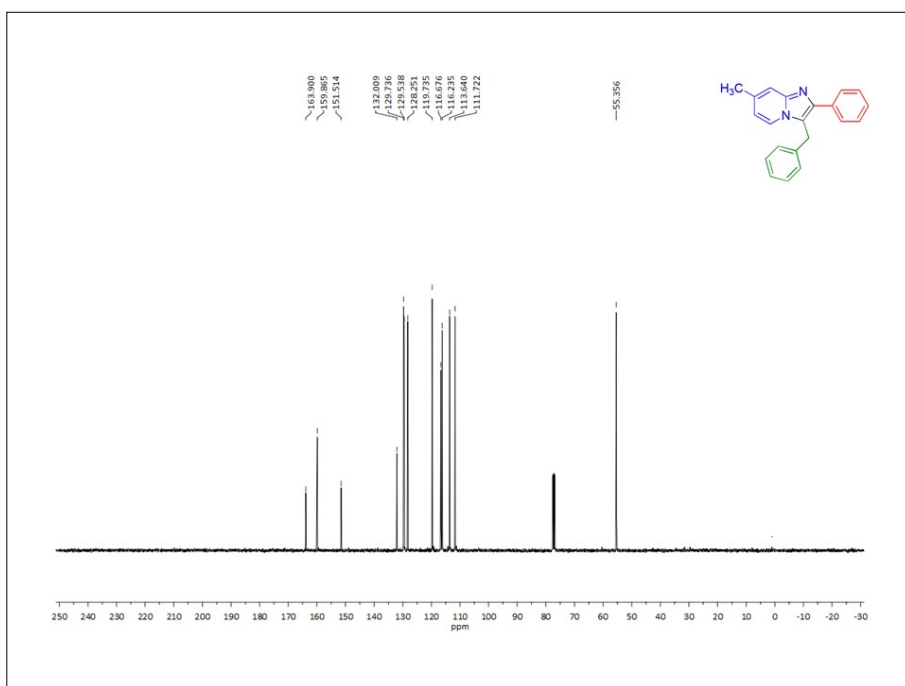

Fig. S57 <sup>13</sup>C NMR of 3-Benzyl-7-methyl-2-phenylimidazo[1,2-*a*]pyridine (4i)

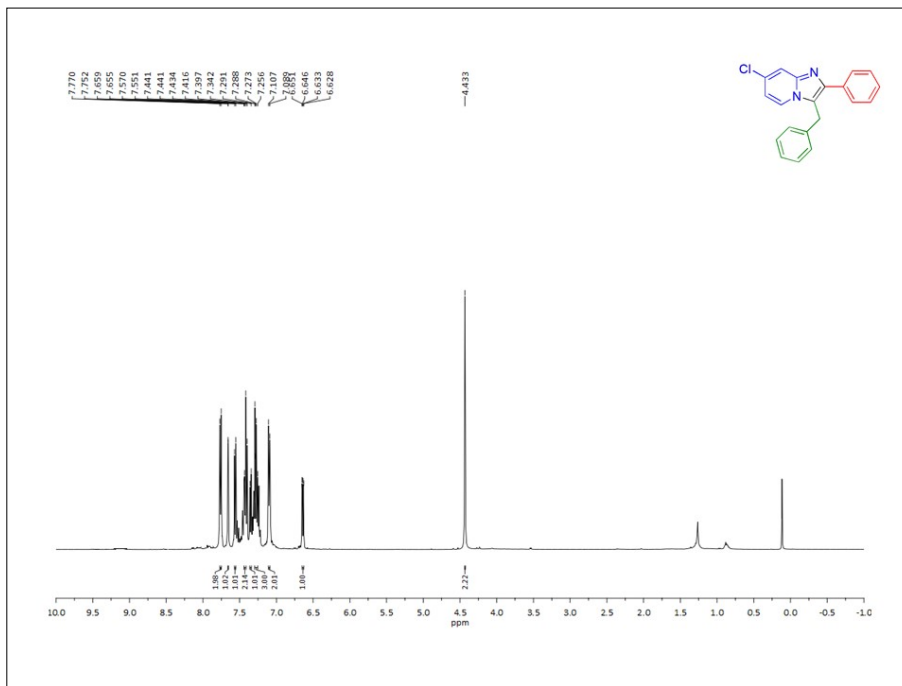

Fig. S58 <sup>1</sup>H NMR of 3-Benzyl-7-chloro-2-phenylimidazo[1,2-*a*]pyridine (4j)

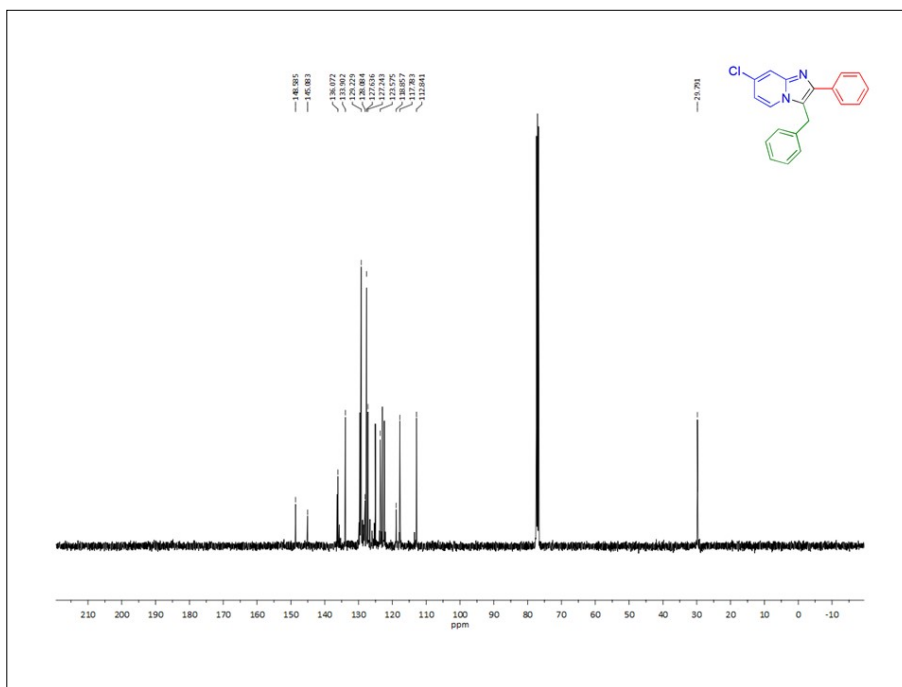

Fig. S59 <sup>13</sup>C NMR of 3-Benzyl-7-chloro-2-phenylimidazo[1,2-*a*]pyridine (4j)





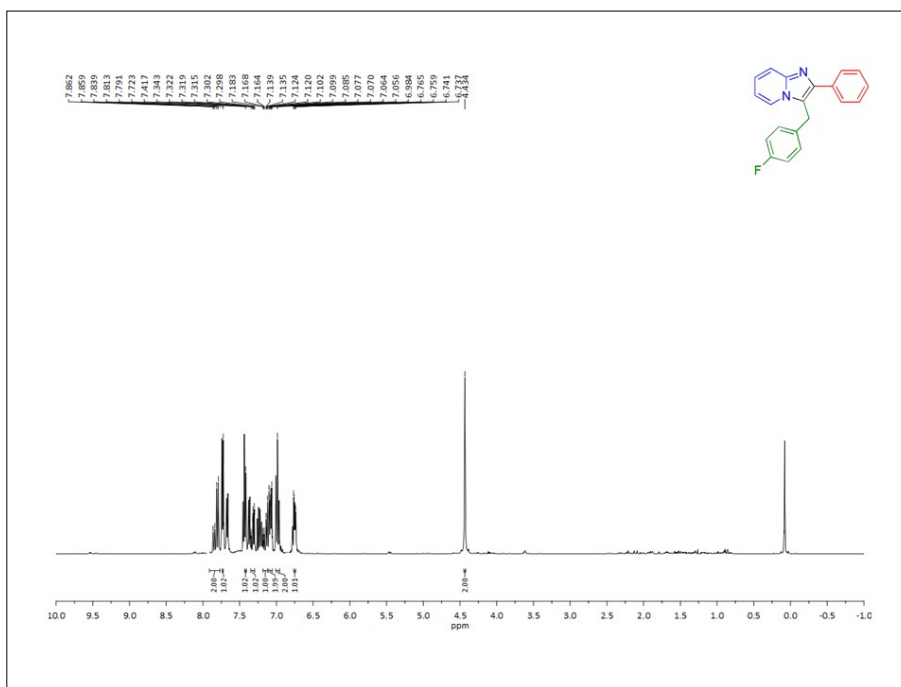

Fig. S62  $^1\text{H NMR}$  of 3-(4-Fluorobenzyl)-2-phenylimidazo[1,2-a]pyridine (4l)

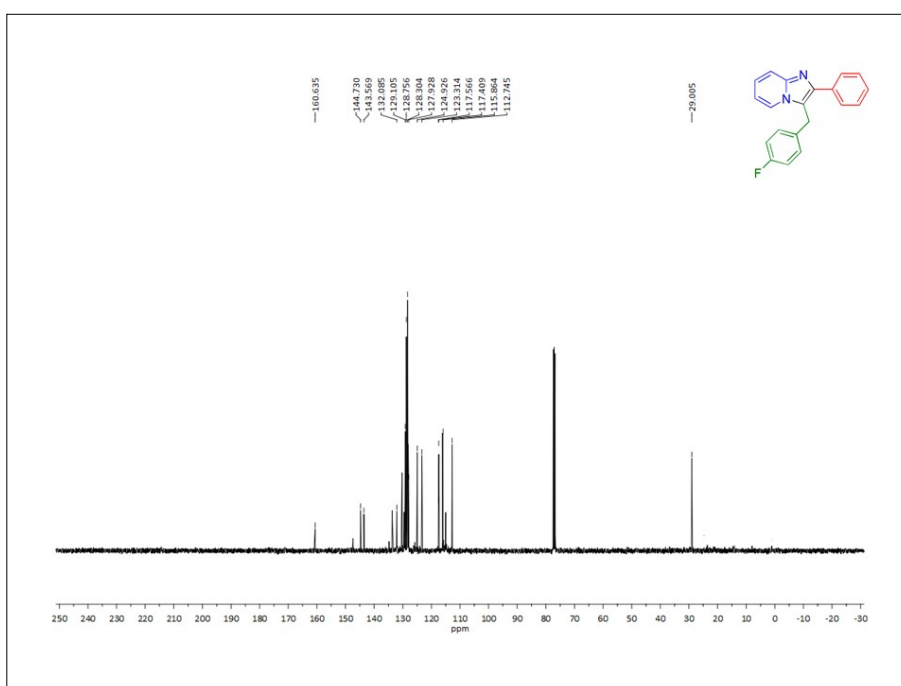

Fig. S63  $^{13}\text{C NMR}$  of 3-(4-Fluorobenzyl)-2-phenylimidazo[1,2-a]pyridine (4l)

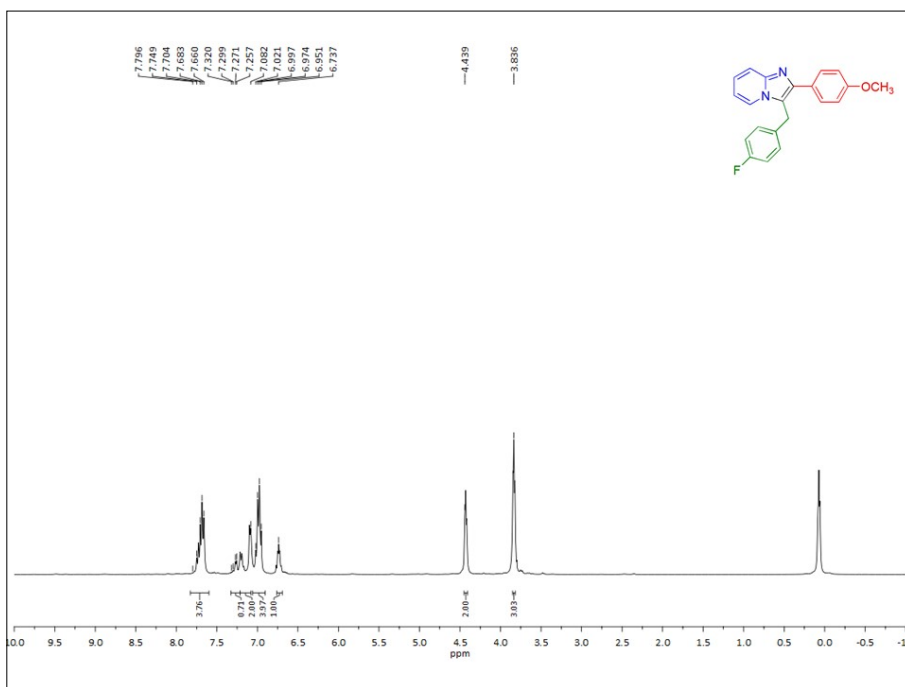

Fig. S64 <sup>1</sup>H NMR of 3-(4-fluorobenzyl)-2-(4-methoxyphenyl)imidazo[1,2-a]pyridine (4m)

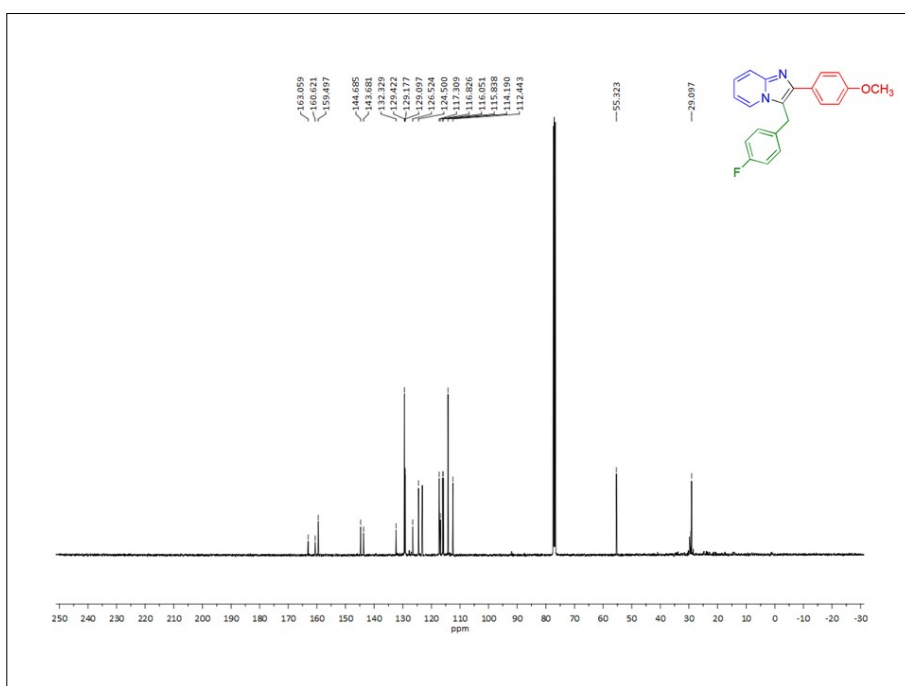

Fig. S65 <sup>13</sup>C NMR of 3-(4-fluorobenzyl)-2-(4-methoxyphenyl)imidazo[1,2-a]pyridine (4m)

# Display Report

## Analysis Info

Analysis Name D:\Data\DEC-2019\HSB\30122019\_HSB\_TS\_15.d  
Method Pos\_tune\_low\_05122019.m  
Sample Name Tmix-131118  
Comment

Acquisition Date 12/30/2019 2:53:21 PM  
Operator Amit S.Sahu  
Instrument micrOTOF-Q II 10337

## Acquisition Parameter

|             |            |                       |           |                  |           |
|-------------|------------|-----------------------|-----------|------------------|-----------|
| Source Type | ESI        | Ion Polarity          | Positive  | Set Nebulizer    | 0.5 Bar   |
| Focus       | Not active | Set Capillary         | 4500 V    | Set Dry Heater   | 180 °C    |
| Scan Begin  | 50 m/z     | Set End Plate Offset  | -500 V    | Set Dry Gas      | 4.0 l/min |
| Scan End    | 3000 m/z   | Set Collision Cell RF | 130.0 Vpp | Set Divert Valve | Waste     |

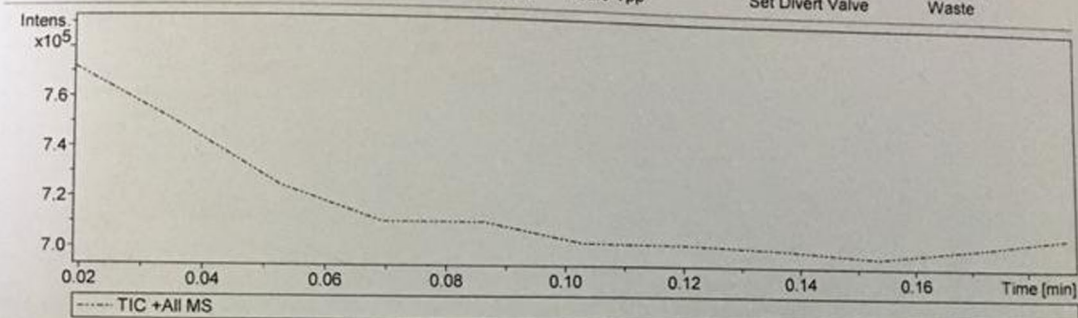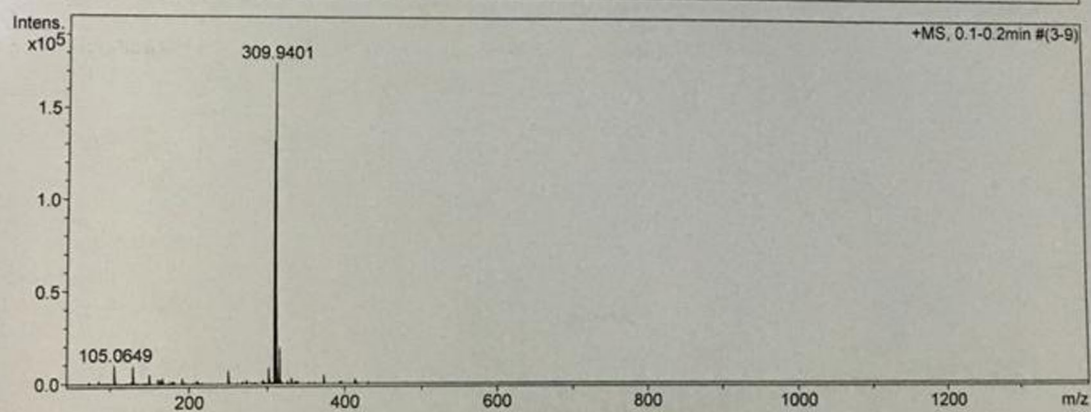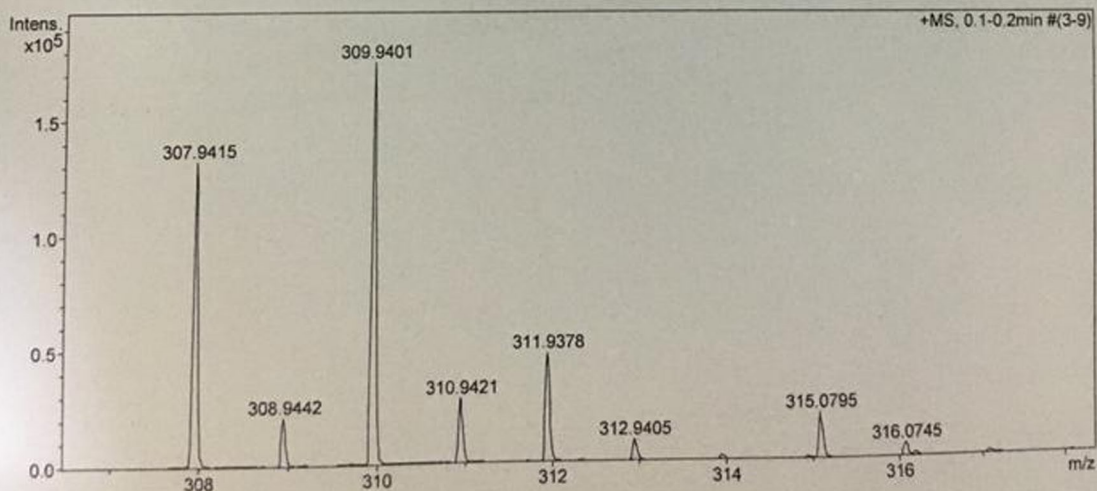

Fig. S66 HRMS of 2-(4-Bromophenyl)-7-chloro-[1,2,4]triazolo[1,5-a]pyridine (31)

- [1] S. Ueda and H. Nagasawa, *J. Am. Chem.Soc.*, 2009, **131**, 15080-1581.
- [2] Z. Zheng, S. Ma, L. Tang, D. Zhang-Negrerie, Y. Du and Kang Zhao, *J. Org. Chem.*, 2014, **79**, 4687-4693.
- [3] X. Meng, C. Yu and P. Zhao, *RSC Adv.*, 2014, **4**, 8612- 8616.
- [4] J. Xia, X. Huang and M. Cai, *Synthesis*, 2019, **51**, 2014-2022.
- [5] T. Nagaraju, P. R. Krishna, B. Sridhar and N. Mangarao, *Synthesis*, 2019, **51**, 3600-3610.
- [6] A. Bhatt, R. K. Singh, R. Kant and B. K. Sarma, *Synthesis*, 2019, **51**, 2883-3890.
- [7] G. Zhang and Y. Hu, *J. Heterocyclic Chem.*, 2007, **44**, 919-922.
- [8] Y. Liao, B. Huang, X. Huang and M. Cai, *ChemistrySelect*, 2019, **4**, 2320- 2326.
- [9] P. Liu, L.-S. Fang, X. Lei and G. -Q. Lin, *Tetrahedron Lett.*, 2010, **51**, 4605- 4608.
- [10] F. Nemat, M. Kaveh, A. Elihampour and M. S. Mirhosseini, *Natl. Acad. Sci. Lett.*, 2019, **42**, 479- 484.
- [11] N. Gunaganti, A. Kharbanda, N. R. Lakkaniga, L. Zhang, R. Cooper, H. -Y. Li and B. Frett, *Chem. Comm.*, 2018, **54**, 12954-12957.
